# Supplementary material for: Enhancing Jkn Participant Retention Through an Innovative Marketing Communication Model
Source: Research Square preprint supplement (doi:10.21203/rs.3.rs-8485458/v1), 2026-01-08
Supplement: Supplementary file 1 [file 3ea068bb0cd071953ee9f517.xlsx]

## Sheet: Navigation
	SmartPLS report
	Please cite the use of SmartPLS: Ringle, C. M., Wende, S., and Becker, J.-M. 2022. "SmartPLS 4." Oststeinbek: SmartPLS GmbH, http://www.smartpls.com.
		complete
	Final results
	Path coefficients	show
	Intercepts	show
	Total indirect effects	show
	Specific indirect effects	show
	Total effects	show
	Outer loadings	show
	Outer weights	show
	Quality criteria
	R-square	show
	R-square adjusted	show
	f-square	show
	Average variance extracted (AVE)	show
	Composite reliability (rho_c)	show
	Composite reliability (rho_a)	show
	Cronbach's alpha	show
	Heterotrait-monotrait ratio (HTMT)	show
	Latent variable correlations	show
	Model fit
	SRMR	show
	d_ULS	show
	d_G	show
	Algorithm
	Setting	show
	Samples	show
	Execution log	show
	Histograms
	Path coefficients histogram	show
	Indirect effects histogram	show
	Total effects histogram	show
	Outer weights histogram	show
	Model and data
	Inner model	show
	Outer model	show
	Indicator data (original)	show
	Indicator data (standardized)	show

## Sheet: complete
	SmartPLS report
	Please cite the use of SmartPLS: Ringle, C. M., Wende, S., and Becker, J.-M. 2022. "SmartPLS 4." Oststeinbek: SmartPLS GmbH, http://www.smartpls.com.
	back to navigation
	Final results
	Path coefficients
	Mean, STDEV, T values, p values
		Original sample (O)	Sample mean (M)	Standard deviation (STDEV)	T statistics (|O/STDEV|)	P values
	Citra Merek -> Retensi Peserta	0.0780353	0.0788504	0.0370274	2.1075	0.0351238
	Customer Online Experience Pandawa -> Citra Merek	0.513773	0.51635	0.0479249	10.7204	5.68434e-14
	Customer Online Experience Pandawa -> Kesadaran Merek	0.562136	0.563341	0.0410996	13.6774	5.68434e-14
	Customer Online Experience Pandawa -> Resonansi Merek	0.463309	0.464607	0.0564791	8.20319	5.68434e-14
	Kepercayaan -> Retensi Peserta	0.369755	0.370761	0.0332951	11.1054	5.68434e-14
	Kesadaran Merek -> Retensi Peserta	0.0659727	0.0661229	0.034444	1.91536	0.0555031
	Resonansi Merek -> Retensi Peserta	0.576875	0.575953	0.0322683	17.8775	5.68434e-14
	Kepercayaan x Kesadaran Merek -> Retensi Peserta	-0.0322286	-0.0334658	0.03218	1.00151	0.316628
	Kepercayaan x Resonansi Merek -> Retensi Peserta	0.0726572	0.0715104	0.0336156	2.16142	0.0307104
	Kepercayaan x Citra Merek -> Retensi Peserta	-0.0823994	-0.0816253	0.0388593	2.12045	0.0340168
	Confidence intervals
		Original sample (O)	Sample mean (M)	2.5%	97.5%
	Citra Merek -> Retensi Peserta	0.0780353	0.0788504	0.0063368	0.150944
	Customer Online Experience Pandawa -> Citra Merek	0.513773	0.51635	0.418481	0.606101
	Customer Online Experience Pandawa -> Kesadaran Merek	0.562136	0.563341	0.478099	0.640162
	Customer Online Experience Pandawa -> Resonansi Merek	0.463309	0.464607	0.347501	0.568614
	Kepercayaan -> Retensi Peserta	0.369755	0.370761	0.306265	0.434959
	Kesadaran Merek -> Retensi Peserta	0.0659727	0.0661229	0.000117266	0.133298
	Resonansi Merek -> Retensi Peserta	0.576875	0.575953	0.509836	0.639278
	Kepercayaan x Kesadaran Merek -> Retensi Peserta	-0.0322286	-0.0334658	-0.0966537	0.0298614
	Kepercayaan x Resonansi Merek -> Retensi Peserta	0.0726572	0.0715104	0.00615465	0.136969
	Kepercayaan x Citra Merek -> Retensi Peserta	-0.0823994	-0.0816253	-0.156354	-0.00422635
	Confidence intervals bias corrected
		Original sample (O)	Sample mean (M)	Bias	2.5%	97.5%
	Citra Merek -> Retensi Peserta	0.0780353	0.0788504	0.00081512	0.00455956	0.149441
	Customer Online Experience Pandawa -> Citra Merek	0.513773	0.51635	0.00257687	0.408744	0.600321
	Customer Online Experience Pandawa -> Kesadaran Merek	0.562136	0.563341	0.0012049	0.472659	0.634489
	Customer Online Experience Pandawa -> Resonansi Merek	0.463309	0.464607	0.00129802	0.340505	0.562383
	Kepercayaan -> Retensi Peserta	0.369755	0.370761	0.00100591	0.304966	0.43348
	Kesadaran Merek -> Retensi Peserta	0.0659727	0.0661229	0.000150159	-0.000750744	0.132652
	Resonansi Merek -> Retensi Peserta	0.576875	0.575953	-0.00092223	0.511842	0.640824
	Kepercayaan x Kesadaran Merek -> Retensi Peserta	-0.0322286	-0.0334658	-0.00123714	-0.0938505	0.0316471
	Kepercayaan x Resonansi Merek -> Retensi Peserta	0.0726572	0.0715104	-0.00114683	0.00766733	0.138558
	Kepercayaan x Citra Merek -> Retensi Peserta	-0.0823994	-0.0816253	0.00077411	-0.157221	-0.00524696
	Intercepts
	The absence of this result is intentional and aligns with your model or chosen algorithm settings.
	Total indirect effects
	Mean, STDEV, T values, p values
		Original sample (O)	Sample mean (M)	Standard deviation (STDEV)	T statistics (|O/STDEV|)	P values
	Customer Online Experience Pandawa -> Retensi Peserta	0.34445	0.346079	0.040786	8.44528	5.68434e-14
	Confidence intervals
		Original sample (O)	Sample mean (M)	2.5%	97.5%
	Customer Online Experience Pandawa -> Retensi Peserta	0.34445	0.346079	0.263293	0.423571
	Confidence intervals bias corrected
		Original sample (O)	Sample mean (M)	Bias	2.5%	97.5%
	Customer Online Experience Pandawa -> Retensi Peserta	0.34445	0.346079	0.00162982	0.259072	0.419507
	Specific indirect effects
	Mean, STDEV, T values, p values
		Original sample (O)	Sample mean (M)	Standard deviation (STDEV)	T statistics (|O/STDEV|)	P values
	Customer Online Experience Pandawa -> Citra Merek -> Retensi Peserta	0.0400925	0.0408879	0.0199046	2.01423	0.0440389
	Customer Online Experience Pandawa -> Kesadaran Merek -> Retensi Peserta	0.0370857	0.0375053	0.0201076	1.84436	0.0651893
	Customer Online Experience Pandawa -> Resonansi Merek -> Retensi Peserta	0.267272	0.267686	0.0365423	7.31402	2.84217e-13
	Confidence intervals
		Original sample (O)	Sample mean (M)	2.5%	97.5%
	Customer Online Experience Pandawa -> Citra Merek -> Retensi Peserta	0.0400925	0.0408879	0.00314019	0.0804118
	Customer Online Experience Pandawa -> Kesadaran Merek -> Retensi Peserta	0.0370857	0.0375053	5.22743e-05	0.078408
	Customer Online Experience Pandawa -> Resonansi Merek -> Retensi Peserta	0.267272	0.267686	0.194769	0.339075
	Confidence intervals bias corrected
		Original sample (O)	Sample mean (M)	Bias	2.5%	97.5%
	Customer Online Experience Pandawa -> Citra Merek -> Retensi Peserta	0.0400925	0.0408879	0.000795416	0.0019166	0.079163
	Customer Online Experience Pandawa -> Kesadaran Merek -> Retensi Peserta	0.0370857	0.0375053	0.000419592	-0.000303376	0.0782551
	Customer Online Experience Pandawa -> Resonansi Merek -> Retensi Peserta	0.267272	0.267686	0.00041481	0.193706	0.337848
	Total effects
	Mean, STDEV, T values, p values
		Original sample (O)	Sample mean (M)	Standard deviation (STDEV)	T statistics (|O/STDEV|)	P values
	Citra Merek -> Retensi Peserta	0.0780353	0.0788504	0.0370274	2.1075	0.0351238
	Customer Online Experience Pandawa -> Citra Merek	0.513773	0.51635	0.0479249	10.7204	5.68434e-14
	Customer Online Experience Pandawa -> Kesadaran Merek	0.562136	0.563341	0.0410996	13.6774	5.68434e-14
	Customer Online Experience Pandawa -> Resonansi Merek	0.463309	0.464607	0.0564791	8.20319	5.68434e-14
	Customer Online Experience Pandawa -> Retensi Peserta	0.34445	0.346079	0.040786	8.44528	5.68434e-14
	Kepercayaan -> Retensi Peserta	0.369755	0.370761	0.0332951	11.1054	5.68434e-14
	Kesadaran Merek -> Retensi Peserta	0.0659727	0.0661229	0.034444	1.91536	0.0555031
	Resonansi Merek -> Retensi Peserta	0.576875	0.575953	0.0322683	17.8775	5.68434e-14
	Kepercayaan x Kesadaran Merek -> Retensi Peserta	-0.0322286	-0.0334658	0.03218	1.00151	0.316628
	Kepercayaan x Resonansi Merek -> Retensi Peserta	0.0726572	0.0715104	0.0336156	2.16142	0.0307104
	Kepercayaan x Citra Merek -> Retensi Peserta	-0.0823994	-0.0816253	0.0388593	2.12045	0.0340168
	Confidence intervals
		Original sample (O)	Sample mean (M)	2.5%	97.5%
	Citra Merek -> Retensi Peserta	0.0780353	0.0788504	0.0063368	0.150944
	Customer Online Experience Pandawa -> Citra Merek	0.513773	0.51635	0.418481	0.606101
	Customer Online Experience Pandawa -> Kesadaran Merek	0.562136	0.563341	0.478099	0.640162
	Customer Online Experience Pandawa -> Resonansi Merek	0.463309	0.464607	0.347501	0.568614
	Customer Online Experience Pandawa -> Retensi Peserta	0.34445	0.346079	0.263293	0.423571
	Kepercayaan -> Retensi Peserta	0.369755	0.370761	0.306265	0.434959
	Kesadaran Merek -> Retensi Peserta	0.0659727	0.0661229	0.000117266	0.133298
	Resonansi Merek -> Retensi Peserta	0.576875	0.575953	0.509836	0.639278
	Kepercayaan x Kesadaran Merek -> Retensi Peserta	-0.0322286	-0.0334658	-0.0966537	0.0298614
	Kepercayaan x Resonansi Merek -> Retensi Peserta	0.0726572	0.0715104	0.00615465	0.136969
	Kepercayaan x Citra Merek -> Retensi Peserta	-0.0823994	-0.0816253	-0.156354	-0.00422635
	Confidence intervals bias corrected
		Original sample (O)	Sample mean (M)	Bias	2.5%	97.5%
	Citra Merek -> Retensi Peserta	0.0780353	0.0788504	0.00081512	0.00455956	0.149441
	Customer Online Experience Pandawa -> Citra Merek	0.513773	0.51635	0.00257687	0.408744	0.600321
	Customer Online Experience Pandawa -> Kesadaran Merek	0.562136	0.563341	0.0012049	0.472659	0.634489
	Customer Online Experience Pandawa -> Resonansi Merek	0.463309	0.464607	0.00129802	0.340505	0.562383
	Customer Online Experience Pandawa -> Retensi Peserta	0.34445	0.346079	0.00162982	0.259072	0.419507
	Kepercayaan -> Retensi Peserta	0.369755	0.370761	0.00100591	0.304966	0.43348
	Kesadaran Merek -> Retensi Peserta	0.0659727	0.0661229	0.000150159	-0.000750744	0.132652
	Resonansi Merek -> Retensi Peserta	0.576875	0.575953	-0.00092223	0.511842	0.640824
	Kepercayaan x Kesadaran Merek -> Retensi Peserta	-0.0322286	-0.0334658	-0.00123714	-0.0938505	0.0316471
	Kepercayaan x Resonansi Merek -> Retensi Peserta	0.0726572	0.0715104	-0.00114683	0.00766733	0.138558
	Kepercayaan x Citra Merek -> Retensi Peserta	-0.0823994	-0.0816253	0.00077411	-0.157221	-0.00524696
	Outer loadings
	Mean, STDEV, T values, p values
		Original sample (O)	Sample mean (M)	Standard deviation (STDEV)	T statistics (|O/STDEV|)	P values
	MO1 <- Kepercayaan	0.847288	0.846472	0.017318	48.9254	5.68434e-14
	MO2 <- Kepercayaan	0.896471	0.895977	0.0116816	76.7422	5.68434e-14
	MO3 <- Kepercayaan	0.907232	0.906962	0.00999958	90.7271	5.68434e-14
	MO4 <- Kepercayaan	0.866539	0.866102	0.0142446	60.833	5.68434e-14
	X11 <- Customer Online Experience Pandawa	0.836139	0.835224	0.0188858	44.2735	5.68434e-14
	X12 <- Customer Online Experience Pandawa	0.827137	0.825939	0.0205659	40.2189	5.68434e-14
	X13 <- Customer Online Experience Pandawa	0.850855	0.850753	0.0159215	53.4408	5.68434e-14
	X14 <- Customer Online Experience Pandawa	0.808771	0.80815	0.0200743	40.289	5.68434e-14
	X15 <- Customer Online Experience Pandawa	0.871868	0.871009	0.0157879	55.2238	5.68434e-14
	Y1 <- Retensi Peserta	0.822018	0.821433	0.0201454	40.8042	5.68434e-14
	Y2 <- Retensi Peserta	0.814333	0.81387	0.0222509	36.5978	5.68434e-14
	Y3 <- Retensi Peserta	0.819224	0.818523	0.0179537	45.6299	5.68434e-14
	Y4 <- Retensi Peserta	0.806747	0.806602	0.0213369	37.8099	5.68434e-14
	Z11 <- Kesadaran Merek	0.858158	0.857875	0.016457	52.1456	5.68434e-14
	Z12 <- Kesadaran Merek	0.85376	0.853614	0.0159561	53.5069	5.68434e-14
	Z13 <- Kesadaran Merek	0.844635	0.844346	0.0138459	61.0025	5.68434e-14
	Z14 <- Kesadaran Merek	0.887182	0.886419	0.0135924	65.2703	5.68434e-14
	Z21 <- Citra Merek	0.762393	0.762464	0.0283844	26.8596	5.68434e-14
	Z22 <- Citra Merek	0.841898	0.840735	0.0231786	36.3222	5.68434e-14
	Z23 <- Citra Merek	0.771701	0.769388	0.0291324	26.4895	5.68434e-14
	Z24 <- Citra Merek	0.816243	0.815467	0.0211731	38.551	5.68434e-14
	Z31 <- Resonansi Merek	0.857657	0.857175	0.0160452	53.4524	5.68434e-14
	Z32 <- Resonansi Merek	0.883457	0.883159	0.0122165	72.317	5.68434e-14
	Z33 <- Resonansi Merek	0.849341	0.848676	0.0162843	52.1572	5.68434e-14
	Z34 <- Resonansi Merek	0.884468	0.88401	0.0119508	74.0089	5.68434e-14
	Kepercayaan x Resonansi Merek -> Kepercayaan x Resonansi Merek	1	1	1.7985e-15	n/a	n/a
	Kepercayaan x Kesadaran Merek -> Kepercayaan x Kesadaran Merek	1	1	1.8992e-15	n/a	n/a
	Kepercayaan x Citra Merek -> Kepercayaan x Citra Merek	1	1	1.76804e-15	n/a	n/a
	Confidence intervals
		Original sample (O)	Sample mean (M)	2.5%	97.5%
	MO1 <- Kepercayaan	0.847288	0.846472	0.808578	0.877117
	MO2 <- Kepercayaan	0.896471	0.895977	0.870674	0.917407
	MO3 <- Kepercayaan	0.907232	0.906962	0.885738	0.925093
	MO4 <- Kepercayaan	0.866539	0.866102	0.836372	0.892128
	X11 <- Customer Online Experience Pandawa	0.836139	0.835224	0.794802	0.868295
	X12 <- Customer Online Experience Pandawa	0.827137	0.825939	0.781977	0.863425
	X13 <- Customer Online Experience Pandawa	0.850855	0.850753	0.815575	0.879583
	X14 <- Customer Online Experience Pandawa	0.808771	0.80815	0.76616	0.844645
	X15 <- Customer Online Experience Pandawa	0.871868	0.871009	0.83689	0.899072
	Y1 <- Retensi Peserta	0.822018	0.821433	0.778047	0.857643
	Y2 <- Retensi Peserta	0.814333	0.81387	0.765855	0.853881
	Y3 <- Retensi Peserta	0.819224	0.818523	0.781727	0.851857
	Y4 <- Retensi Peserta	0.806747	0.806602	0.76081	0.844033
	Z11 <- Kesadaran Merek	0.858158	0.857875	0.822932	0.887558
	Z12 <- Kesadaran Merek	0.85376	0.853614	0.819552	0.882411
	Z13 <- Kesadaran Merek	0.844635	0.844346	0.815173	0.869708
	Z14 <- Kesadaran Merek	0.887182	0.886419	0.856526	0.910247
	Z21 <- Citra Merek	0.762393	0.762464	0.702227	0.813988
	Z22 <- Citra Merek	0.841898	0.840735	0.791009	0.881018
	Z23 <- Citra Merek	0.771701	0.769388	0.705786	0.820386
	Z24 <- Citra Merek	0.816243	0.815467	0.769413	0.852388
	Z31 <- Resonansi Merek	0.857657	0.857175	0.824053	0.886755
	Z32 <- Resonansi Merek	0.883457	0.883159	0.857663	0.905661
	Z33 <- Resonansi Merek	0.849341	0.848676	0.814222	0.878459
	Z34 <- Resonansi Merek	0.884468	0.88401	0.859063	0.905987
	Kepercayaan x Resonansi Merek -> Kepercayaan x Resonansi Merek	1	1	1	1
	Kepercayaan x Kesadaran Merek -> Kepercayaan x Kesadaran Merek	1	1	1	1
	Kepercayaan x Citra Merek -> Kepercayaan x Citra Merek	1	1	1	1
	Confidence intervals bias corrected
		Original sample (O)	Sample mean (M)	Bias	2.5%	97.5%
	MO1 <- Kepercayaan	0.847288	0.846472	-0.000816736	0.808	0.876739
	MO2 <- Kepercayaan	0.896471	0.895977	-0.000494047	0.870611	0.917384
	MO3 <- Kepercayaan	0.907232	0.906962	-0.000269749	0.885281	0.924828
	MO4 <- Kepercayaan	0.866539	0.866102	-0.000436876	0.835947	0.891934
	X11 <- Customer Online Experience Pandawa	0.836139	0.835224	-0.000915161	0.793469	0.867512
	X12 <- Customer Online Experience Pandawa	0.827137	0.825939	-0.00119871	0.784245	0.863976
	X13 <- Customer Online Experience Pandawa	0.850855	0.850753	-0.000102606	0.813555	0.878137
	X14 <- Customer Online Experience Pandawa	0.808771	0.80815	-0.000621211	0.763385	0.843416
	X15 <- Customer Online Experience Pandawa	0.871868	0.871009	-0.000859264	0.835641	0.898248
	Y1 <- Retensi Peserta	0.822018	0.821433	-0.000585168	0.776158	0.856851
	Y2 <- Retensi Peserta	0.814333	0.81387	-0.000462616	0.764	0.852282
	Y3 <- Retensi Peserta	0.819224	0.818523	-0.000701201	0.781701	0.851816
	Y4 <- Retensi Peserta	0.806747	0.806602	-0.000145133	0.757953	0.842226
	Z11 <- Kesadaran Merek	0.858158	0.857875	-0.000283198	0.821539	0.886627
	Z12 <- Kesadaran Merek	0.85376	0.853614	-0.000145828	0.816593	0.880425
	Z13 <- Kesadaran Merek	0.844635	0.844346	-0.000289686	0.814285	0.868983
	Z14 <- Kesadaran Merek	0.887182	0.886419	-0.000762832	0.855847	0.909725
	Z21 <- Citra Merek	0.762393	0.762464	7.0945e-05	0.699327	0.812113
	Z22 <- Citra Merek	0.841898	0.840735	-0.0011629	0.788914	0.880394
	Z23 <- Citra Merek	0.771701	0.769388	-0.00231338	0.706426	0.821007
	Z24 <- Citra Merek	0.816243	0.815467	-0.000775083	0.766902	0.850848
	Z31 <- Resonansi Merek	0.857657	0.857175	-0.000481935	0.823834	0.886492
	Z32 <- Resonansi Merek	0.883457	0.883159	-0.000297532	0.857112	0.905086
	Z33 <- Resonansi Merek	0.849341	0.848676	-0.000664993	0.813978	0.878381
	Z34 <- Resonansi Merek	0.884468	0.88401	-0.000458202	0.858799	0.905795
	Kepercayaan x Resonansi Merek -> Kepercayaan x Resonansi Merek	1	1	-4.44089e-16	1	1
	Kepercayaan x Kesadaran Merek -> Kepercayaan x Kesadaran Merek	1	1	-6.66134e-16	1	1
	Kepercayaan x Citra Merek -> Kepercayaan x Citra Merek	1	1	0	1	1
	Outer weights
	Mean, STDEV, T values, p values
		Original sample (O)	Sample mean (M)	Standard deviation (STDEV)	T statistics (|O/STDEV|)	P values
	MO1 <- Kepercayaan	0.28603	0.285776	0.00869919	32.88	5.68434e-14
	MO2 <- Kepercayaan	0.293436	0.293681	0.00898208	32.6691	5.68434e-14
	MO3 <- Kepercayaan	0.280307	0.28051	0.00898801	31.1868	5.68434e-14
	MO4 <- Kepercayaan	0.277298	0.277641	0.008802	31.5039	5.68434e-14
	X11 <- Customer Online Experience Pandawa	0.234815	0.234675	0.0137982	17.0178	5.68434e-14
	X12 <- Customer Online Experience Pandawa	0.231392	0.23124	0.0128053	18.07	5.68434e-14
	X13 <- Customer Online Experience Pandawa	0.260502	0.261339	0.0159963	16.2851	5.68434e-14
	X14 <- Customer Online Experience Pandawa	0.239745	0.240086	0.0149326	16.0551	5.68434e-14
	X15 <- Customer Online Experience Pandawa	0.225632	0.225397	0.0119966	18.808	5.68434e-14
	Y1 <- Retensi Peserta	0.323691	0.323905	0.0100756	32.1263	5.68434e-14
	Y2 <- Retensi Peserta	0.31586	0.315867	0.00943142	33.4902	5.68434e-14
	Y3 <- Retensi Peserta	0.291456	0.291686	0.00880552	33.0992	5.68434e-14
	Y4 <- Retensi Peserta	0.294934	0.29514	0.00868685	33.9518	5.68434e-14
	Z11 <- Kesadaran Merek	0.274813	0.274857	0.0119029	23.0878	5.68434e-14
	Z12 <- Kesadaran Merek	0.294876	0.295164	0.0120275	24.5168	5.68434e-14
	Z13 <- Kesadaran Merek	0.318845	0.319161	0.0147178	21.6639	5.68434e-14
	Z14 <- Kesadaran Merek	0.274021	0.273689	0.00998891	27.4325	5.68434e-14
	Z21 <- Citra Merek	0.375685	0.37664	0.0214548	17.5105	5.68434e-14
	Z22 <- Citra Merek	0.331466	0.331602	0.0180022	18.4125	5.68434e-14
	Z23 <- Citra Merek	0.250373	0.249498	0.0186784	13.4044	5.68434e-14
	Z24 <- Citra Merek	0.295631	0.295921	0.0150962	19.5832	5.68434e-14
	Z31 <- Resonansi Merek	0.275169	0.275487	0.00877307	31.3652	5.68434e-14
	Z32 <- Resonansi Merek	0.310303	0.310538	0.00894122	34.7048	5.68434e-14
	Z33 <- Resonansi Merek	0.285414	0.285295	0.00900363	31.6999	5.68434e-14
	Z34 <- Resonansi Merek	0.279768	0.279865	0.00900904	31.0542	5.68434e-14
	Kepercayaan x Resonansi Merek -> Kepercayaan x Resonansi Merek	1	1	1.46902e-15	n/a	n/a
	Kepercayaan x Kesadaran Merek -> Kepercayaan x Kesadaran Merek	1	1	1.39338e-15	n/a	n/a
	Kepercayaan x Citra Merek -> Kepercayaan x Citra Merek	1	1	1.5443e-15	n/a	n/a
	Confidence intervals
		Original sample (O)	Sample mean (M)	2.5%	97.5%
	MO1 <- Kepercayaan	0.28603	0.285776	0.268946	0.302774
	MO2 <- Kepercayaan	0.293436	0.293681	0.276966	0.311484
	MO3 <- Kepercayaan	0.280307	0.28051	0.263294	0.298254
	MO4 <- Kepercayaan	0.277298	0.277641	0.261147	0.295624
	X11 <- Customer Online Experience Pandawa	0.234815	0.234675	0.206851	0.261314
	X12 <- Customer Online Experience Pandawa	0.231392	0.23124	0.205975	0.256104
	X13 <- Customer Online Experience Pandawa	0.260502	0.261339	0.232697	0.29465
	X14 <- Customer Online Experience Pandawa	0.239745	0.240086	0.211563	0.270476
	X15 <- Customer Online Experience Pandawa	0.225632	0.225397	0.201126	0.24852
	Y1 <- Retensi Peserta	0.323691	0.323905	0.30578	0.345195
	Y2 <- Retensi Peserta	0.31586	0.315867	0.298312	0.335113
	Y3 <- Retensi Peserta	0.291456	0.291686	0.275087	0.30982
	Y4 <- Retensi Peserta	0.294934	0.29514	0.278994	0.313102
	Z11 <- Kesadaran Merek	0.274813	0.274857	0.251296	0.298801
	Z12 <- Kesadaran Merek	0.294876	0.295164	0.27187	0.319563
	Z13 <- Kesadaran Merek	0.318845	0.319161	0.291762	0.349655
	Z14 <- Kesadaran Merek	0.274021	0.273689	0.253018	0.292801
	Z21 <- Citra Merek	0.375685	0.37664	0.337859	0.422634
	Z22 <- Citra Merek	0.331466	0.331602	0.296872	0.368023
	Z23 <- Citra Merek	0.250373	0.249498	0.209895	0.283952
	Z24 <- Citra Merek	0.295631	0.295921	0.265592	0.325294
	Z31 <- Resonansi Merek	0.275169	0.275487	0.258485	0.293137
	Z32 <- Resonansi Merek	0.310303	0.310538	0.293843	0.328817
	Z33 <- Resonansi Merek	0.285414	0.285295	0.267941	0.303338
	Z34 <- Resonansi Merek	0.279768	0.279865	0.262444	0.297798
	Kepercayaan x Resonansi Merek -> Kepercayaan x Resonansi Merek	1	1	1	1
	Kepercayaan x Kesadaran Merek -> Kepercayaan x Kesadaran Merek	1	1	1	1
	Kepercayaan x Citra Merek -> Kepercayaan x Citra Merek	1	1	1	1
	Confidence intervals bias corrected
		Original sample (O)	Sample mean (M)	Bias	2.5%	97.5%
	MO1 <- Kepercayaan	0.28603	0.285776	-0.000253298	0.269239	0.302977
	MO2 <- Kepercayaan	0.293436	0.293681	0.000244767	0.276759	0.311325
	MO3 <- Kepercayaan	0.280307	0.28051	0.000202581	0.262849	0.297687
	MO4 <- Kepercayaan	0.277298	0.277641	0.000343755	0.260676	0.295206
	X11 <- Customer Online Experience Pandawa	0.234815	0.234675	-0.000139651	0.207218	0.261422
	X12 <- Customer Online Experience Pandawa	0.231392	0.23124	-0.000152219	0.206467	0.256519
	X13 <- Customer Online Experience Pandawa	0.260502	0.261339	0.00083787	0.233109	0.294849
	X14 <- Customer Online Experience Pandawa	0.239745	0.240086	0.000341462	0.211754	0.270737
	X15 <- Customer Online Experience Pandawa	0.225632	0.225397	-0.000235114	0.201806	0.248954
	Y1 <- Retensi Peserta	0.323691	0.323905	0.000214118	0.306186	0.345806
	Y2 <- Retensi Peserta	0.31586	0.315867	6.86176e-06	0.29893	0.336177
	Y3 <- Retensi Peserta	0.291456	0.291686	0.000229833	0.275308	0.31018
	Y4 <- Retensi Peserta	0.294934	0.29514	0.000205827	0.279196	0.313444
	Z11 <- Kesadaran Merek	0.274813	0.274857	4.38263e-05	0.25124	0.298722
	Z12 <- Kesadaran Merek	0.294876	0.295164	0.000288147	0.271377	0.318755
	Z13 <- Kesadaran Merek	0.318845	0.319161	0.000315854	0.293254	0.35101
	Z14 <- Kesadaran Merek	0.274021	0.273689	-0.000331665	0.253256	0.292913
	Z21 <- Citra Merek	0.375685	0.37664	0.000955335	0.338387	0.423422
	Z22 <- Citra Merek	0.331466	0.331602	0.000136136	0.296806	0.367884
	Z23 <- Citra Merek	0.250373	0.249498	-0.000874782	0.210409	0.284391
	Z24 <- Citra Merek	0.295631	0.295921	0.000289195	0.265336	0.324733
	Z31 <- Resonansi Merek	0.275169	0.275487	0.000317867	0.257669	0.292676
	Z32 <- Resonansi Merek	0.310303	0.310538	0.000234289	0.293903	0.328837
	Z33 <- Resonansi Merek	0.285414	0.285295	-0.000118304	0.26816	0.303511
	Z34 <- Resonansi Merek	0.279768	0.279865	9.67524e-05	0.261993	0.297412
	Kepercayaan x Resonansi Merek -> Kepercayaan x Resonansi Merek	1	1	4.44089e-16	1	1
	Kepercayaan x Kesadaran Merek -> Kepercayaan x Kesadaran Merek	1	1	-4.44089e-16	1	1
	Kepercayaan x Citra Merek -> Kepercayaan x Citra Merek	1	1	4.44089e-16	1	1
	Quality criteria
	R-square
	The absence of this result is intentional and aligns with your model or chosen algorithm settings.
	R-square adjusted
	The absence of this result is intentional and aligns with your model or chosen algorithm settings.
	f-square
	The absence of this result is intentional and aligns with your model or chosen algorithm settings.
	Average variance extracted (AVE)
	The absence of this result is intentional and aligns with your model or chosen algorithm settings.
	Composite reliability (rho_c)
	The absence of this result is intentional and aligns with your model or chosen algorithm settings.
	Composite reliability (rho_a)
	The absence of this result is intentional and aligns with your model or chosen algorithm settings.
	Cronbach's alpha
	The absence of this result is intentional and aligns with your model or chosen algorithm settings.
	Heterotrait-monotrait ratio (HTMT)
	The absence of this result is intentional and aligns with your model or chosen algorithm settings.
	Latent variable correlations
	The absence of this result is intentional and aligns with your model or chosen algorithm settings.
	Model fit
	SRMR
	The absence of this result is intentional and aligns with your model or chosen algorithm settings.
	d_ULS
	The absence of this result is intentional and aligns with your model or chosen algorithm settings.
	d_G
	The absence of this result is intentional and aligns with your model or chosen algorithm settings.
	Algorithm
	Setting
	Data file
		Setting
	Data file	Olah Data
	Weighting vector	-
	PLS-SEM algorithm
		Setting
	Initial weights	1.0
	Max. number of iterations	3000
	Stop criterion	10⁻⁷
	Type of results	Standardized
	Use Lohmoeller settings?	No
	Weighting scheme	Path
	Bootstrapping
		Setting
	Complexity	Most important (faster)
	Confidence interval method	Percentile bootstrap
	Parallel processing	Yes
	Samples	5000
	Save results per sample	No
	Seed	Fixed seed
	Significance level	0.05
	Test type	Two tailed
	Construct outer weighting mode
		Setting
	Citra Merek	AUTOMATIC
	Customer Online Experience Pandawa	AUTOMATIC
	Kepercayaan	AUTOMATIC
	Kesadaran Merek	AUTOMATIC
	Resonansi Merek	AUTOMATIC
	Retensi Peserta	AUTOMATIC
	Samples
	The absence of this result is intentional and aligns with your model or chosen algorithm settings.
	Execution log
	Reading score matrix of complete data set
	Calculating full data set.
	Calculating original sample.
	Running samples [5000 done] (11 seconds).
	Calculating inner weights.
	Calculating indirect effects.
	Calculating specific indirect effects
	Calculating total effect.
	Calculating outer weights.
	Calculating outer loadings.
	Calculating outer loadings.
	Calculating model decoration.
	All calculations done.
	Histograms
	Path coefficients histogram
	Indirect effects histogram
	Total effects histogram
	Outer weights histogram
	Model and data
	Inner model
		Citra Merek	Customer Online Experience Pandawa	Kepercayaan	Kesadaran Merek	Resonansi Merek	Retensi Peserta
	Citra Merek						1
	Customer Online Experience Pandawa	1			1	1
	Kepercayaan						1
	Kesadaran Merek						1
	Resonansi Merek						1
	Retensi Peserta
	Outer model
		Citra Merek	Customer Online Experience Pandawa	Kepercayaan	Kesadaran Merek	Resonansi Merek	Retensi Peserta
	MO1			-1
	MO2			-1
	MO3			-1
	MO4			-1
	X11		-1
	X12		-1
	X13		-1
	X14		-1
	X15		-1
	Y1						-1
	Y2						-1
	Y3						-1
	Y4						-1
	Z11				-1
	Z12				-1
	Z13				-1
	Z14				-1
	Z21	-1
	Z22	-1
	Z23	-1
	Z24	-1
	Z31					-1
	Z32					-1
	Z33					-1
	Z34					-1
	Indicator data (original)
	Matrix
	Case index	MO1	MO2	MO3	MO4	X11	X12	X13	X14	X15	Y1	Y2	Y3	Y4	Z11	Z12	Z13	Z14	Z21	Z22	Z23	Z24	Z31	Z32	Z33	Z34
	0	6	8	6	5	8	9	8	6	8	9	9	8	8	6	10	8	8	8	7	6	6	7	9	8	7
	1	5	5	6	5	2	5	5	6	4	4	4	4	4	6	5	5	6	4	4	6	1	5	4	5	5
	2	3	4	4	3	4	3	3	4	2	2	3	4	1	5	3	2	2	5	4	2	1	4	3	5	3
	3	8	7	8	6	4	8	7	8	4	6	5	6	5	5	4	3	5	3	3	4	1	6	5	4	4
	4	5	7	4	6	6	8	6	6	6	7	8	8	8	7	7	7	7	7	7	5	6	8	7	7	5
	5	8	8	8	8	10	7	10	9	10	5	8	7	8	8	6	9	8	9	8	6	5	4	8	5	6
	6	3	5	5	5	6	3	5	4	6	7	5	4	6	5	5	8	8	8	5	5	5	7	8	7	6
	7	6	9	6	9	8	8	9	6	8	4	7	7	8	4	3	6	4	6	5	5	5	6	5	5	5
	8	7	6	6	6	8	8	6	6	8	7	7	9	5	6	5	7	6	7	8	7	9	7	7	6	5
	9	6	8	8	5	5	6	8	8	5	7	7	7	8	7	5	8	7	8	6	7	6	7	7	7	7
	10	5	6	4	5	4	7	6	5	4	6	7	7	8	6	5	4	6	4	6	6	5	7	7	6	4
	11	8	5	5	3	5	6	5	5	5	5	3	5	5	4	3	4	5	2	4	3	3	5	3	4	4
	12	8	7	6	5	7	8	7	6	7	8	7	7	6	6	6	8	6	8	7	6	6	7	7	5	6
	13	5	7	4	7	6	7	7	6	6	8	8	10	9	8	9	7	8	7	7	6	6	8	8	9	7
	14	8	8	9	8	5	8	8	9	5	8	8	7	6	7	9	8	7	8	7	6	5	8	8	6	5
	15	6	7	5	5	6	6	7	5	6	4	4	5	4	6	4	4	6	4	6	7	5	6	4	5	4
	16	4	4	6	3	5	5	7	5	5	2	4	3	3	4	3	2	4	2	2	2	3	5	4	3	2
	17	1	4	4	4	2	3	4	4	2	3	3	2	2	3	1	2	3	2	3	3	1	3	3	2	3
	18	7	4	5	3	5	9	6	5	5	5	5	4	5	6	5	8	6	8	3	2	1	6	5	6	6
	19	8	4	5	3	5	3	3	5	5	3	3	5	5	6	4	6	6	5	5	5	4	5	3	4	5
	20	3	4	5	4	2	3	4	4	2	5	4	4	2	5	3	3	4	3	2	1	3	3	4	5	3
	21	3	1	1	2	4	7	7	9	4	3	5	1	1	4	3	2	5	2	5	2	1	3	5	5	3
	22	5	4	5	3	3	5	3	5	3	2	2	3	3	5	4	3	4	3	3	6	5	3	2	2	3
	23	4	5	5	6	6	6	5	5	6	2	2	3	3	3	2	2	2	2	4	6	4	3	2	3	3
	24	9	9	9	10	7	9	10	9	7	7	7	9	9	6	5	7	6	7	8	6	6	6	7	7	9
	25	6	7	9	6	4	8	7	6	4	7	7	5	8	8	9	7	8	7	5	7	4	9	7	6	9
	26	6	9	9	7	9	9	9	9	9	9	9	5	4	6	4	9	8	9	3	6	4	8	9	7	8
	27	2	1	1	2	8	8	6	6	8	8	7	4	4	6	7	7	6	8	8	7	6	7	7	5	6
	28	9	6	8	8	8	9	6	8	8	5	5	7	8	4	4	4	4	4	4	2	4	3	5	4	3
	29	4	8	7	8	5	7	8	6	5	9	6	5	6	6	5	8	6	6	7	6	9	8	6	5	5
	30	3	4	4	2	8	8	8	8	8	3	3	3	1	6	5	5	3	4	5	2	4	2	3	5	3
	31	5	9	9	9	5	7	9	9	5	9	6	7	6	6	7	8	6	8	7	7	6	7	6	9	9
	32	5	7	6	3	6	5	7	9	6	7	5	5	6	8	9	10	8	7	8	7	6	7	5	8	6
	33	4	5	7	5	8	8	7	7	8	3	3	5	6	4	3	4	2	4	3	2	4	3	3	5	3
	34	5	5	3	2	5	7	7	7	5	7	6	3	2	8	5	5	8	7	5	2	4	8	6	6	5
	35	5	5	3	5	6	5	6	7	6	7	7	1	3	6	7	10	8	10	4	2	1	7	7	5	6
	36	4	5	6	4	4	8	7	7	4	8	8	5	4	8	7	7	8	5	6	7	4	8	8	7	5
	37	5	8	8	8	5	7	8	8	5	6	9	8	6	6	5	6	8	6	5	5	8	9	9	8	5
	38	1	5	4	4	4	3	5	4	4	6	6	1	4	7	4	4	7	6	4	1	1	7	6	5	7
	39	4	7	7	4	8	8	7	7	8	8	8	5	6	7	8	6	7	10	8	7	6	6	8	9	8
	40	4	8	7	7	8	8	8	7	8	3	6	5	6	8	5	6	8	6	4	1	2	5	6	3	4
	41	8	7	9	9	8	8	7	7	8	8	8	8	6	8	7	10	8	10	4	7	8	6	8	5	6
	42	7	7	7	7	4	7	7	7	4	7	7	9	8	7	8	8	7	8	7	6	9	8	7	8	8
	43	8	7	7	9	8	8	8	7	8	8	8	6	6	7	5	8	7	8	4	6	8	8	8	9	6
	44	8	7	8	5	8	8	8	8	8	8	8	8	6	8	7	10	8	4	5	3	3	7	8	8	6
	45	3	4	1	3	6	7	4	6	6	2	2	2	1	4	2	4	2	4	3	3	4	4	2	2	4
	46	2	5	4	3	5	7	6	6	5	6	9	3	1	4	4	4	4	2	6	7	8	8	9	7	8
	47	8	6	9	9	9	8	6	7	9	8	8	6	8	8	7	10	8	10	9	6	6	9	8	7	9
	48	7	7	8	8	8	8	7	8	8	8	8	7	6	8	7	9	8	9	9	6	6	9	8	8	9
	49	1	3	4	4	4	7	7	4	4	3	3	4	2	8	4	4	6	4	4	4	3	1	3	2	1
	50	5	6	8	8	4	7	6	7	7	6	7	6	6	8	6	7	8	7	5	8	4	6	7	7	5
	51	5	6	6	4	6	5	4	4	5	5	3	3	4	5	3	4	5	4	4	8	4	5	3	5	6
	52	5	5	5	5	6	5	4	5	5	3	3	5	4	4	1	2	4	4	5	3	4	3	3	5	5
	53	3	4	3	3	4	5	4	3	5	4	3	3	1	4	2	4	2	4	4	8	6	4	3	6	3
	54	4	4	3	3	4	4	4	3	4	6	10	3	2	6	5	4	7	4	5	8	4	10	10	9	8
	55	8	9	7	7	8	7	10	9	7	3	5	8	6	9	10	6	9	6	5	4	4	3	5	8	6
	56	9	10	7	7	10	9	10	9	9	10	10	10	10	10	10	8	10	10	10	8	8	10	10	9	8
	57	10	10	10	10	9	10	10	10	10	6	7	10	9	9	10	8	10	8	10	8	9	6	7	8	8
	58	9	9	7	7	10	9	10	10	9	10	10	8	10	7	9	10	7	10	10	8	9	10	10	10	10
	59	9	10	7	6	10	9	10	8	9	6	9	9	10	10	9	8	10	8	9	8	9	6	9	10	8
	60	1	1	1	1	3	5	6	4	5	7	8	3	1	2	4	4	3	4	7	5	5	7	8	9	10
	61	1	1	1	5	6	7	7	5	7	7	6	3	2	3	1	4	3	4	7	7	6	7	6	8	7
	62	4	8	6	6	8	10	8	7	10	6	8	5	5	6	8	6	8	8	8	7	6	6	8	8	9
	63	3	4	3	5	8	8	8	6	8	4	4	4	2	6	7	4	6	4	7	6	6	4	4	5	2
	64	6	7	6	6	9	9	8	6	9	6	6	6	8	2	2	4	2	3	5	3	2	6	6	8	8
	65	7	10	10	10	5	7	10	7	7	9	7	6	10	10	7	8	10	8	6	8	9	9	7	10	9
	66	4	6	4	4	2	4	6	4	4	2	2	4	4	4	2	3	5	2	4	3	2	2	2	3	3
	67	8	9	7	7	6	10	10	7	10	8	6	9	9	10	6	8	10	8	6	7	9	8	6	9	10
	68	8	8	6	6	6	8	8	6	8	8	5	6	8	8	5	5	8	6	7	5	5	8	5	6	5
	69	6	5	7	7	6	7	7	7	7	7	9	9	6	6	4	2	3	4	6	8	4	7	9	8	8
	70	3	3	4	4	4	7	6	6	7	4	3	3	4	6	4	4	2	4	2	4	2	3	3	5	3
	71	5	3	4	4	4	7	6	4	7	3	4	4	5	2	2	5	7	5	4	3	3	3	4	4	2
	72	8	7	6	6	5	8	7	6	8	8	6	8	6	7	7	5	7	5	5	4	2	8	6	7	5
	73	8	8	7	7	7	8	8	7	8	7	8	8	7	7	4	6	7	6	8	8	9	8	8	8	7
	74	6	5	3	3	6	6	7	6	6	4	6	5	5	7	7	4	7	4	7	8	9	4	6	6	4
	75	3	4	2	4	5	7	6	5	7	5	8	1	4	7	4	8	7	8	7	7	5	5	8	6	5
	76	5	6	6	4	7	7	6	6	7	7	6	5	5	6	4	5	7	5	5	7	6	7	6	8	7
	77	4	3	4	4	6	8	6	4	8	3	5	2	2	6	4	4	6	4	4	3	2	3	5	6	6
	78	6	6	6	3	8	8	6	6	8	3	5	6	5	7	5	8	7	8	7	5	5	3	5	6	4
	79	8	8	7	5	7	8	8	6	8	5	5	9	6	7	5	8	7	8	5	3	2	7	5	7	4
	80	3	4	7	4	4	7	4	4	5	3	5	3	5	7	6	4	7	5	4	3	2	2	5	2	2
	81	5	5	4	5	3	5	4	4	7	8	8	4	7	4	8	5	8	5	5	8	9	8	8	8	6
	82	4	4	4	4	3	4	4	4	4	4	4	4	5	5	4	5	7	5	4	1	2	6	4	3	2
	83	6	4	3	5	3	6	4	3	6	3	5	3	4	6	4	5	3	5	3	1	3	7	5	5	2
	84	5	4	5	6	7	7	6	5	7	4	5	4	6	5	5	8	7	8	5	7	8	4	5	6	3
	85	6	5	4	4	7	7	7	7	7	4	5	5	6	9	5	7	9	7	7	5	9	4	5	5	4
	86	5	7	5	5	6	5	7	5	5	3	5	5	6	8	5	7	8	7	7	7	5	3	5	6	2
	87	5	5	6	4	3	5	7	4	5	4	4	5	7	3	2	4	3	4	6	6	4	4	4	5	3
	88	5	4	3	5	7	5	8	6	5	5	4	6	7	4	4	5	6	5	6	8	9	5	4	3	5
	89	3	4	2	3	5	8	7	5	8	7	4	1	2	9	8	6	10	6	6	7	8	4	4	4	6
	90	3	1	2	3	4	7	7	5	7	4	4	1	2	7	7	5	7	5	4	4	2	4	4	5	4
	91	5	3	3	3	6	5	6	6	5	4	3	5	6	6	5	4	3	4	3	6	2	4	3	5	4
	92	4	3	4	4	2	4	6	4	4	4	4	4	4	5	7	6	7	6	4	2	4	2	4	4	2
	93	7	9	9	9	8	9	9	7	9	8	9	9	8	7	9	5	7	8	4	8	10	8	9	8	8
	94	6	4	6	4	9	10	8	9	10	4	5	5	4	6	5	4	5	4	4	1	2	4	5	3	5
	95	5	5	6	9	4	5	7	7	5	6	9	5	8	6	5	4	6	4	6	8	9	6	9	10	8
	96	3	4	4	4	6	7	9	7	7	7	5	4	4	9	6	6	9	6	9	8	6	7	5	4	5
	97	3	5	3	3	8	7	5	6	7	1	4	4	5	4	5	5	5	5	4	6	3	5	4	3	1
	98	4	7	3	3	5	8	7	6	8	2	4	4	5	5	2	4	5	4	7	7	5	2	4	4	1
	99	4	3	2	1	8	9	8	7	9	4	4	4	2	8	5	4	8	4	7	8	5	1	4	2	2
	100	6	7	4	7	5	6	7	9	7	5	7	4	3	5	5	6	5	5	7	7	5	4	4	7	4
	101	3	5	7	7	8	9	7	9	7	7	3	3	3	7	7	5	5	7	8	6	5	7	6	3	5
	102	2	3	3	3	9	7	8	6	8	5	3	4	4	5	5	5	5	5	5	4	3	5	6	3	5
	103	4	4	4	6	3	4	4	6	4	6	10	3	5	3	3	6	5	3	7	5	5	6	8	10	8
	104	6	6	9	9	8	10	6	9	6	8	10	8	8	9	6	5	5	6	6	5	5	5	7	10	6
	105	4	3	3	3	6	4	3	6	3	7	5	3	4	4	3	3	3	3	5	4	2	4	6	5	4
	106	2	5	3	6	4	5	7	6	7	4	3	2	5	2	5	3	3	5	5	8	6	4	5	5	4
	107	8	6	6	6	8	8	6	6	6	4	7	6	5	6	5	8	5	5	8	8	5	4	6	7	4
	108	9	9	6	6	6	7	10	9	10	4	10	9	7	6	4	7	4	4	5	6	3	4	5	7	3
	109	2	3	1	2	3	5	5	5	5	5	9	2	3	4	5	5	5	5	9	6	6	5	5	9	8
	110	6	9	7	5	9	8	9	9	9	3	8	7	6	6	5	5	5	5	4	5	5	3	5	8	7
	111	4	4	4	7	8	8	8	9	8	6	6	7	5	5	7	5	5	7	8	6	6	6	5	6	3
	112	6	6	6	7	3	6	6	6	6	7	8	7	7	5	6	6	6	6	6	6	5	7	7	8	4
	113	7	5	6	4	5	7	6	6	6	7	4	5	2	6	5	7	7	5	5	6	3	7	7	4	5
	114	6	5	5	5	4	6	5	5	5	7	7	5	4	5	5	6	5	5	8	9	5	7	7	7	5
	115	3	2	3	6	7	5	7	7	7	7	8	5	3	6	5	8	8	5	7	5	5	7	7	6	7
	116	2	2	3	6	5	7	7	9	7	5	2	5	6	4	7	7	7	7	7	7	5	5	2	2	5
	117	6	8	6	6	7	6	8	9	8	7	6	5	7	5	4	6	6	4	7	7	5	7	8	9	7
	118	6	5	5	5	6	6	7	7	7	5	5	7	5	3	4	7	5	4	9	9	6	5	5	5	6
	119	1	2	3	3	5	6	6	7	6	4	6	2	3	4	2	5	5	2	5	6	6	4	6	4	1
	120	4	4	5	5	4	4	4	5	4	1	3	3	4	2	6	5	5	6	9	9	8	4	5	3	4
	121	5	2	1	1	4	5	6	5	6	5	4	3	4	6	6	6	5	6	7	5	6	5	6	6	7
	122	4	3	7	5	4	4	3	5	3	4	6	8	6	7	6	5	5	6	9	6	3	4	5	6	4
	123	4	4	5	2	5	4	4	3	4	9	9	5	5	6	4	7	3	4	6	7	5	9	9	8	8
	124	4	6	6	6	5	4	6	6	6	4	6	3	5	3	4	7	5	4	2	2	2	1	5	6	4
	125	5	3	2	5	4	5	3	5	3	2	5	2	4	5	6	3	3	4	6	6	4	2	5	4	1
	126	6	5	2	5	6	6	5	5	5	6	6	4	4	7	5	6	6	5	4	5	4	4	7	6	3
	127	6	9	8	9	8	8	10	6	10	6	5	7	5	6	7	6	5	7	6	7	6	6	7	5	5
	128	6	9	8	9	9	8	9	6	9	3	5	5	9	6	3	6	5	3	6	7	4	3	5	5	2
	129	9	7	8	9	9	9	7	6	7	3	5	6	6	9	7	6	5	7	9	5	5	3	6	5	4
	130	6	5	8	9	6	6	7	5	7	6	5	6	9	6	7	7	5	7	6	3	6	6	6	5	4
	131	5	8	6	6	5	5	8	6	8	6	8	5	5	7	4	7	7	6	7	7	4	2	4	8	4
	132	5	8	7	5	4	5	8	7	8	5	4	7	9	6	6	6	6	6	5	4	5	5	3	8	7
	133	4	6	6	6	6	6	6	6	6	4	5	5	6	7	6	7	4	6	8	4	6	4	6	5	4
	134	8	9	6	5	7	9	9	9	9	8	8	5	6	7	9	6	5	9	5	5	6	8	7	5	7
	135	5	3	4	2	6	5	6	7	6	5	5	5	6	7	4	7	5	4	6	5	4	5	5	5	7
	136	5	2	4	2	3	5	6	7	6	4	5	5	3	9	7	3	7	7	5	9	10	4	5	5	4
	137	7	5	7	7	9	7	7	7	7	4	4	7	9	7	7	5	5	7	5	4	6	4	5	4	1
	138	6	6	7	6	6	6	6	7	6	5	4	7	8	6	7	6	5	7	5	5	8	2	5	4	5
	139	6	6	6	6	4	6	6	7	6	6	4	7	9	7	6	4	4	6	7	4	7	5	7	4	4
	140	3	2	2	2	8	7	6	6	6	1	4	5	5	3	2	6	6	2	5	3	3	1	2	4	1
	141	2	2	1	1	2	7	5	6	5	5	3	4	3	4	1	4	4	1	6	4	7	2	4	3	1
	142	6	6	7	6	5	6	6	7	6	9	6	6	8	7	6	7	7	6	6	10	10	9	9	5	7
	143	4	8	6	6	6	8	8	7	8	4	9	9	6	7	7	6	6	7	6	4	3	4	5	9	7
	144	4	5	6	5	6	8	7	6	7	6	5	9	6	6	6	6	6	6	6	7	8	6	8	5	5
	145	3	3	2	2	6	7	6	6	6	6	9	5	5	7	6	7	4	6	8	5	6	6	7	9	7
	146	6	6	7	6	5	6	6	7	6	6	5	8	8	7	6	7	4	6	6	7	3	6	9	5	7
	147	2	2	4	5	7	6	6	6	6	5	4	4	3	7	7	6	6	7	6	4	7	5	4	4	4
	148	2	3	4	4	5	7	4	6	4	4	4	3	3	8	7	6	6	7	6	3	8	4	6	4	5
	149	7	6	6	7	4	7	6	6	6	4	4	6	6	3	3	4	4	3	2	4	3	4	7	4	5
	150	5	8	5	8	5	6	5	5	5	6	6	8	8	7	7	6	6	7	9	6	5	9	8	6	9
	151	6	6	4	7	9	7	9	10	10	9	9	6	5	7	4	6	6	4	6	2	3	9	9	8	6
	152	8	5	6	6	8	7	6	7	7	6	6	6	6	7	7	6	6	6	10	10	10	6	8	6	7
	153	6	4	4	6	6	4	4	7	7	6	6	8	4	2	5	7	4	5	6	5	7	4	8	4	7
	154	4	8	5	6	4	6	5	5	5	4	4	6	5	4	2	5	4	2	3	4	8	2	4	4	3
	155	6	5	6	5	6	5	4	8	8	6	4	8	7	5	3	6	6	3	6	3	7	6	8	5	5
	156	6	4	5	7	6	6	5	3	3	5	5	7	6	3	6	6	6	6	8	5	7	5	7	6	5
	157	3	3	5	2	3	4	6	3	3	3	3	4	5	6	6	7	4	6	6	5	4	3	4	4	2
	158	10	7	10	9	6	6	4	5	5	6	6	8	9	6	6	7	5	6	10	10	10	6	6	10	8
	159	9	10	10	8	10	10	10	10	10	10	10	10	10	10	10	9	9	10	10	10	7	10	10	9	10
	160	6	7	10	7	9	7	10	8	8	9	9	10	10	9	10	9	9	10	8	10	8	9	10	10	10
	161	10	10	10	8	10	10	9	10	10	10	10	10	10	10	8	10	10	10	10	10	9	10	10	10	8
	162	10	10	10	8	10	10	9	10	10	9	9	7	8	9	10	7	7	8	8	10	10	7	8	10	10
	163	8	8	8	8	7	8	8	8	8	7	7	6	7	8	4	9	9	9	8	5	8	7	6	7	7
	164	5	6	5	7	7	6	7	7	7	5	5	7	5	6	6	7	7	6	8	5	8	5	7	8	10
	165	10	9	8	10	10	9	8	8	8	6	6	6	9	7	6	7	7	6	8	10	10	6	6	9	7
	166	8	6	6	10	5	8	5	8	8	7	7	6	5	7	8	6	9	8	8	9	8	7	6	6	9
	167	9	9	10	10	9	9	8	8	8	8	8	8	10	9	8	9	9	8	8	9	8	8	10	9	9
	168	7	5	8	7	6	10	9	7	7	7	7	6	5	8	7	9	9	7	8	9	7	6	6	6	9
	169	2	2	2	4	3	6	6	6	6	4	4	2	3	5	2	4	4	2	2	2	2	4	5	6	7
	170	6	7	8	6	6	7	9	10	10	6	6	6	5	8	6	9	9	9	9	9	5	6	6	7	6
	171	7	6	5	5	5	8	5	8	8	6	6	4	8	7	9	9	9	6	8	9	6	6	6	6	6
	172	7	6	7	8	7	6	7	7	7	7	7	6	5	3	6	6	6	4	6	3	4	7	6	6	6
	173	7	6	5	8	7	6	5	4	4	6	6	7	8	7	6	6	6	6	7	3	8	6	6	5	4
	174	5	7	8	8	7	7	8	5	5	5	5	8	7	8	6	9	6	6	5	9	7	5	8	7	6
	175	5	3	5	2	7	6	7	5	5	6	6	3	7	2	4	5	4	7	5	3	7	6	6	8	5
	176	7	6	8	5	7	6	8	7	7	6	6	6	7	8	8	7	7	8	9	5	8	6	7	9	6
	177	7	6	5	6	7	6	7	6	6	7	7	8	8	8	7	9	9	7	7	4	8	7	6	7	6
	178	6	7	6	7	6	7	6	5	5	6	6	7	5	8	9	7	7	7	7	9	7	6	7	7	6
	179	7	7	5	6	7	7	5	5	5	7	7	6	7	4	6	6	6	4	5	4	7	7	6	6	7
	180	7	6	6	4	6	6	6	7	7	6	6	7	6	5	7	7	4	6	8	4	7	6	7	8	6
	181	5	8	8	5	7	8	8	6	6	6	6	7	7	8	5	7	7	8	7	5	7	6	7	7	6
	182	7	6	5	7	7	6	5	5	5	5	5	6	7	8	8	7	7	8	7	6	7	5	6	6	7
	183	2	1	3	2	2	4	3	4	4	6	6	2	2	5	3	5	5	3	6	5	4	2	5	6	3
	184	5	5	4	8	7	5	7	7	7	6	6	6	7	5	3	4	4	5	6	5	5	6	6	8	6
	185	2	2	2	2	3	4	4	4	4	2	2	2	3	3	1	2	2	1	3	1	1	2	2	2	1
	186	2	2	3	4	7	6	9	6	6	5	5	4	3	5	5	5	5	3	3	1	3	5	6	7	6
	187	5	6	6	5	7	6	6	8	8	5	5	6	7	5	8	7	7	8	8	6	4	5	6	7	6
	188	7	6	7	7	7	6	7	7	7	5	5	8	9	7	8	5	5	8	6	5	7	5	8	6	5
	189	6	6	5	7	6	6	7	6	6	8	8	6	6	5	7	7	5	7	9	6	7	8	6	7	9
	190	6	6	7	6	7	6	8	8	8	6	6	6	7	6	8	7	4	8	5	4	4	6	6	6	6
	191	8	5	6	7	7	5	5	6	6	5	5	8	7	5	4	6	6	4	6	4	5	5	8	9	7
	192	10	8	7	8	7	8	9	8	8	8	8	7	7	6	8	7	4	8	9	9	7	8	8	9	8
	193	5	7	5	8	7	7	7	7	7	5	5	6	7	5	3	6	6	3	7	4	7	5	7	6	7
	194	5	4	3	4	5	6	5	7	7	6	6	6	5	4	6	3	3	6	7	4	6	6	5	6	8
	195	5	4	2	4	5	4	6	7	7	1	1	4	5	5	3	6	6	5	4	4	3	1	4	4	2
	196	7	5	7	8	7	6	9	9	9	7	7	6	7	9	8	9	9	9	6	3	7	7	8	5	7
	197	7	5	8	6	7	6	8	9	9	9	9	6	7	8	6	9	7	8	8	5	7	9	9	6	7
	198	2	2	4	4	2	5	3	3	3	1	1	2	4	4	5	3	3	2	6	3	7	5	6	3	2
	199	9	5	9	6	6	10	9	7	7	10	9	8	10	9	8	7	9	8	9	9	10	10	10	9	9
	200	3	2	2	1	5	7	5	7	7	6	6	2	3	5	8	6	6	5	4	3	3	6	5	6	4
	201	7	6	5	6	7	6	5	8	8	5	8	6	7	5	8	6	6	3	7	6	7	5	6	8	6
	202	9	5	8	7	9	10	8	8	8	8	7	8	9	9	9	9	9	8	7	5	6	8	8	7	6
	203	9	6	5	7	7	6	5	8	8	5	6	8	7	7	6	8	8	6	7	5	4	5	6	6	6
	204	7	5	5	6	3	5	3	5	5	3	7	9	7	5	7	8	8	7	6	4	7	3	6	7	5
	205	7	7	8	8	5	3	3	5	5	5	6	6	9	5	6	7	4	6	5	5	7	5	4	6	6
	206	7	5	5	8	5	4	5	6	6	6	6	6	6	5	3	5	5	3	7	5	4	6	4	6	4
	207	7	7	8	7	7	6	9	8	8	5	6	5	5	9	8	9	10	8	6	5	5	5	8	6	5
	208	10	9	9	9	6	7	8	7	7	9	6	9	9	5	3	6	6	3	9	6	6	9	9	6	9
	209	7	6	7	8	5	6	9	8	8	9	7	6	7	5	6	6	6	6	8	5	6	9	6	7	6
	210	6	3	5	4	6	7	5	9	9	5	7	5	6	5	3	5	5	3	6	4	7	5	5	6	6
	211	6	3	3	5	6	9	9	6	6	5	7	7	5	5	4	5	5	6	5	5	5	4	7	6	6
	212	7	4	5	5	7	5	5	8	8	3	5	5	3	5	5	5	5	5	6	4	4	1	7	7	5
	213	4	3	2	2	5	5	7	7	7	4	7	4	3	4	2	4	4	2	6	4	5	4	7	5	5
	214	4	3	2	1	5	6	5	7	7	4	5	4	3	5	3	6	6	3	6	2	1	3	5	6	2
	215	4	6	5	8	7	6	5	8	8	5	6	7	7	4	2	3	3	4	6	3	7	5	6	6	6
	216	7	7	8	8	7	7	8	8	8	5	6	7	7	6	5	7	4	5	6	4	3	5	6	6	7
	217	6	8	6	5	8	9	8	6	8	9	9	8	8	6	10	8	8	8	7	6	6	7	9	8	7
	218	5	5	6	5	2	5	5	6	4	4	4	4	4	6	5	5	6	4	4	6	1	5	4	5	5
	219	3	4	4	3	4	3	3	4	2	2	3	4	1	5	3	2	2	5	4	2	1	4	3	5	3
	220	8	7	8	6	4	8	7	8	4	6	5	6	5	5	4	3	5	3	3	4	1	6	5	4	4
	221	5	7	4	6	6	8	6	6	6	7	8	8	8	7	7	7	7	7	7	5	6	8	7	7	5
	222	8	8	8	8	10	7	10	9	10	5	8	7	8	8	6	9	8	9	8	6	5	4	8	5	6
	223	3	5	5	5	6	3	5	4	6	7	5	4	6	5	5	8	8	8	5	5	5	7	8	7	6
	224	6	9	6	9	8	8	9	6	8	4	7	7	8	4	3	6	4	6	5	5	5	6	5	5	5
	225	7	6	6	6	8	8	6	6	8	7	7	9	5	6	5	7	6	7	8	7	9	7	7	6	5
	226	6	8	8	5	5	6	8	8	5	7	7	7	8	7	5	8	7	8	6	7	6	7	7	7	7
	227	5	6	4	5	4	7	6	5	4	6	7	7	8	6	5	4	6	4	6	6	5	7	7	6	4
	228	8	5	5	3	5	6	5	5	5	5	3	5	5	4	3	4	5	2	4	3	3	5	3	4	4
	229	8	7	6	5	7	8	7	6	7	8	7	7	6	6	6	8	6	8	7	6	6	7	7	5	6
	230	5	7	4	7	6	7	7	6	6	8	8	10	9	8	9	7	8	7	7	6	6	8	8	9	7
	231	8	8	9	8	5	8	8	9	5	8	8	7	6	7	9	8	7	8	7	6	5	8	8	6	5
	232	6	7	5	5	6	6	7	5	6	4	4	5	4	6	4	4	6	4	6	7	5	6	4	5	4
	233	4	4	6	3	5	5	7	5	5	2	4	3	3	4	3	2	4	2	2	2	3	5	4	3	2
	234	1	4	4	4	2	3	4	4	2	3	3	2	2	3	1	2	3	2	3	3	1	3	3	2	3
	235	7	4	5	3	5	9	6	5	5	5	5	4	5	6	5	8	6	8	3	2	1	6	5	6	6
	236	8	4	5	3	5	3	3	5	5	3	3	5	5	6	4	6	6	5	5	5	4	5	3	4	5
	237	3	4	5	4	2	3	4	4	2	5	4	4	2	5	3	3	4	3	2	1	3	3	4	5	3
	238	3	1	1	2	4	7	7	9	4	3	5	1	1	4	3	2	5	2	5	2	1	3	5	5	3
	239	5	4	5	3	3	5	3	5	3	2	2	3	3	5	4	3	4	3	3	6	5	3	2	2	3
	240	4	5	5	6	6	6	5	5	6	2	2	3	3	3	2	2	2	2	4	6	4	3	2	3	3
	241	9	9	9	10	7	9	10	9	7	7	7	9	9	6	5	7	6	7	8	6	6	6	7	7	9
	242	6	7	9	6	4	8	7	6	4	7	7	5	8	8	9	7	8	7	5	7	4	9	7	6	9
	243	6	9	9	7	9	9	9	9	9	9	9	5	4	6	4	9	8	9	3	6	4	8	9	7	8
	244	2	1	1	2	8	8	6	6	8	8	7	4	4	6	7	7	6	8	8	7	6	7	7	5	6
	245	9	6	8	8	8	9	6	8	8	5	5	7	8	4	4	4	4	4	4	2	4	3	5	4	3
	246	4	8	7	8	5	7	8	6	5	9	6	5	6	6	5	8	6	6	7	6	9	8	6	5	5
	247	3	4	4	2	8	8	8	8	8	3	3	3	1	6	5	5	3	4	5	2	4	2	3	5	3
	248	5	9	9	9	5	7	9	9	5	9	6	7	6	6	7	8	6	8	7	7	6	7	6	9	9
	249	5	7	6	3	6	5	7	9	6	7	5	5	6	8	9	10	8	7	8	7	6	7	5	8	6
	250	4	5	7	5	8	8	7	7	8	3	3	5	6	4	3	4	2	4	3	2	4	3	3	5	3
	251	5	5	3	2	5	7	7	7	5	7	6	3	2	8	5	5	8	7	5	2	4	8	6	6	5
	252	5	5	3	5	6	5	6	7	6	7	7	1	3	6	7	10	8	10	4	2	1	7	7	5	6
	253	4	5	6	4	4	8	7	7	4	8	8	5	4	8	7	7	8	5	6	7	4	8	8	7	5
	254	5	8	8	8	5	7	8	8	5	6	9	8	6	6	5	6	8	6	5	5	8	9	9	8	5
	255	1	5	4	4	4	3	5	4	4	6	6	1	4	7	4	4	7	6	4	1	1	7	6	5	7
	256	4	7	7	4	8	8	7	7	8	8	8	5	6	7	8	6	7	10	8	7	6	6	8	9	8
	257	4	8	7	7	8	8	8	7	8	3	6	5	6	8	5	6	8	6	4	1	2	5	6	3	4
	258	8	7	9	9	8	8	7	7	8	8	8	8	6	8	7	10	8	10	4	7	8	6	8	5	6
	259	7	7	7	7	4	7	7	7	4	7	7	9	8	7	8	8	7	8	7	6	9	8	7	8	8
	260	8	7	7	9	8	8	8	7	8	8	8	6	6	7	5	8	7	8	4	6	8	8	8	9	6
	261	8	7	8	5	8	8	8	8	8	8	8	8	6	8	7	10	8	4	5	3	3	7	8	8	6
	262	3	4	1	3	6	7	4	6	6	2	2	2	1	4	2	4	2	4	3	3	4	4	2	2	4
	263	2	5	4	3	5	7	6	6	5	6	9	3	1	4	4	4	4	2	6	7	8	8	9	7	8
	264	8	6	9	9	9	8	6	7	9	8	8	6	8	8	7	10	8	10	9	6	6	9	8	7	9
	265	7	7	8	8	8	8	7	8	8	8	8	7	6	8	7	9	8	9	9	6	6	9	8	8	9
	266	1	3	4	4	4	7	7	4	4	3	3	4	2	8	4	4	6	4	4	4	3	1	3	2	1
	267	5	6	8	8	4	7	6	7	7	6	7	6	6	8	6	7	8	7	5	8	4	6	7	7	5
	268	5	6	6	4	6	5	4	4	5	5	3	3	4	5	3	4	5	4	4	8	4	5	3	5	6
	269	5	5	5	5	6	5	4	5	5	3	3	5	4	4	1	2	4	4	5	3	4	3	3	5	5
	270	3	4	3	3	4	5	4	3	5	4	3	3	1	4	2	4	2	4	4	8	6	4	3	6	3
	271	4	4	3	3	4	4	4	3	4	6	10	3	2	6	5	4	7	4	5	8	4	10	10	9	8
	272	8	9	7	7	8	7	10	9	7	3	5	8	6	9	10	6	9	6	5	4	4	3	5	8	6
	273	9	10	7	7	10	9	10	9	9	10	10	10	10	10	10	8	10	10	10	8	8	10	10	9	8
	274	10	10	10	10	9	10	10	10	10	6	7	10	9	9	10	8	10	8	10	8	9	6	7	8	8
	275	9	9	7	7	10	9	10	10	9	10	10	8	10	7	9	10	7	10	10	8	9	10	10	10	10
	276	9	10	7	6	10	9	10	8	9	6	9	9	10	10	9	8	10	8	9	8	9	6	9	10	8
	277	1	1	1	1	3	5	6	4	5	7	8	3	1	2	4	4	3	4	7	5	5	7	8	9	10
	278	1	1	1	5	6	7	7	5	7	7	6	3	2	3	1	4	3	4	7	7	6	7	6	8	7
	279	4	8	6	6	8	10	8	7	10	6	8	5	5	6	8	6	8	8	8	7	6	6	8	8	9
	280	3	4	3	5	8	8	8	6	8	4	4	4	2	6	7	4	6	4	7	6	6	4	4	5	2
	281	6	7	6	6	9	9	8	6	9	6	6	6	8	2	2	4	2	3	5	3	2	6	6	8	8
	282	7	10	10	10	5	7	10	7	7	9	7	6	10	10	7	8	10	8	6	8	9	9	7	10	9
	283	4	6	4	4	2	4	6	4	4	2	2	4	4	4	2	3	5	2	4	3	2	2	2	3	3
	284	8	9	7	7	6	10	10	7	10	8	6	9	9	10	6	8	10	8	6	7	9	8	6	9	10
	285	8	8	6	6	6	8	8	6	8	8	5	6	8	8	5	5	8	6	7	5	5	8	5	6	5
	286	6	5	7	7	6	7	7	7	7	7	9	9	6	6	4	2	3	4	6	8	4	7	9	8	8
	287	3	3	4	4	4	7	6	6	7	4	3	3	4	6	4	4	2	4	2	4	2	3	3	5	3
	MV descriptives
		Mean	Median	Observed min	Observed max	Standard deviation	Excess kurtosis	Skewness	Number of observations used	Cramér-von Mises test statistic	Cramér-von Mises p value
	MO1	5.47569	5	1	10	2.19202	-0.63714	-0.0228136	288	0.477999	4.3603e-06
	MO2	5.68403	6	1	10	2.20184	-0.57947	-0.0511365	288	0.469151	5.30223e-06
	MO3	5.56944	6	1	10	2.22409	-0.582966	-0.0954622	288	0.457395	6.89721e-06
	MO4	5.51736	5	1	10	2.18733	-0.699954	0.0315126	288	0.483096	3.89922e-06
	X11	6.01389	6	2	10	1.96492	-0.587077	0.0108895	288	0.594843	3.98026e-07
	X12	6.70833	7	3	10	1.71341	-0.44653	-0.206117	288	0.822139	1.03517e-08
	X13	6.67014	7	3	10	1.8063	-0.548172	-0.0537698	288	0.69317	6.97236e-08
	X14	6.47222	6	3	10	1.66226	-0.528207	0.0625591	288	0.826307	9.80278e-09
	X15	6.47917	7	2	10	1.87071	-0.551513	-0.146355	288	0.77136	2.08432e-08
	Y1	5.65972	6	1	10	2.08721	-0.655439	-0.0736494	288	0.542605	1.11127e-06
	Y2	5.92708	6	1	10	2.06447	-0.69511	-0.0183983	288	0.541195	1.14362e-06
	Y3	5.52431	5	1	10	2.18091	-0.649599	0.0224983	288	0.486217	3.64256e-06
	Y4	5.5625	6	1	10	2.32653	-0.66972	-0.0747977	288	0.462306	6.1769e-06
	Z11	6.07986	6	2	10	1.85514	-0.416154	-0.0418843	288	0.655796	1.31279e-07
	Z12	5.44097	5	1	10	2.17706	-0.564525	0.10978	288	0.512595	2.06915e-06
	Z13	5.97917	6	2	10	2.0309	-0.664946	-0.00906514	288	0.596689	3.84338e-07
	Z14	6.00694	6	2	10	2.01727	-0.596636	-0.0733099	288	0.559686	7.88244e-07
	Z21	5.75	6	1	10	2.17307	-0.803002	0.036225	288	0.695209	6.74277e-08
	Z22	5.96875	6	2	10	1.91006	-0.57165	0.0568573	288	0.606808	3.17745e-07
	Z23	5.39931	6	1	10	2.19618	-0.644836	-0.0775477	288	0.518752	1.81793e-06
	Z24	5.29167	5	1	10	2.31053	-0.66941	0.0400524	288	0.454618	7.34313e-06
	Z31	5.67361	6	1	10	2.13545	-0.620437	-0.0896189	288	0.523161	1.65801e-06
	Z32	6.05903	6	2	10	1.98431	-0.643232	-0.084822	288	0.58191	5.09883e-07
	Z33	6.11806	6	2	10	2.00172	-0.6058	-0.00138268	288	0.654008	1.35437e-07
	Z34	5.54167	6	1	10	2.21853	-0.63266	0.000892373	288	0.460007	6.50372e-06
	Indicator data (standardized)
	Matrix
	Case index	MO1	MO2	MO3	MO4	X11	X12	X13	X14	X15	Y1	Y2	Y3	Y4	Z11	Z12	Z13	Z14	Z21	Z22	Z23	Z24	Z31	Z32	Z33	Z34	Kepercayaan x Resonansi Merek	Kepercayaan x Kesadaran Merek	Kepercayaan x Citra Merek
	0	0.239188	1.05184	0.193587	-0.236526	1.01078	1.33749	0.736235	-0.284084	0.81297	1.60036	1.48848	1.13517	1.0477	-0.0430486	2.09413	0.995042	0.987994	1.0354	0.539905	0.273518	0.306568	0.621129	1.48211	0.940162	0.657342	-0.122576	-0.134347	-0.251837
	1	-0.217012	-0.310663	0.193587	-0.236526	-2.04277	-0.997039	-0.924619	-0.284084	-1.32525	-0.795188	-0.933451	-0.698932	-0.6716	-0.0430486	-0.202554	-0.482134	-0.00344249	-0.805313	-1.03073	0.273518	-1.85744	-0.315443	-1.03765	-0.558547	-0.244156	-0.397468	-0.52091	-0.327589
	2	-1.12941	-0.764829	-0.705658	-1.15088	-1.02492	-2.1643	-2.03185	-1.48726	-2.39436	-1.75341	-1.41784	-0.698932	-1.96107	-0.582092	-1.12123	-1.95931	-1.98632	-0.345134	-1.03073	-1.54783	-1.85744	-0.783728	-1.54161	-0.558547	-1.14565	0.682605	1.15301	0.903665
	3	1.15159	0.597671	1.09283	0.220652	-1.02492	0.753859	0.182617	0.919095	-1.32525	0.16303	-0.449066	0.218118	-0.241776	-0.582092	-0.66189	-1.46692	-0.499161	-1.26549	-1.55427	-0.637155	-1.85744	0.152843	-0.533701	-1.05812	-0.694905	-1.00648	-1.36723	-1.89045
	4	-0.217012	0.597671	-0.705658	0.220652	-0.00706842	0.753859	-0.371001	-0.284084	-0.256141	0.642139	1.00409	1.13517	1.0477	0.495995	0.716118	0.50265	0.492276	0.575224	0.539905	-0.181818	0.306568	1.08942	0.474206	0.440593	-0.244156	-0.507376	-0.571444	-0.510706
	5	1.15159	1.05184	1.09283	1.13501	2.02864	0.170226	1.84347	1.52068	1.88208	-0.316079	1.00409	0.676643	1.0477	1.03504	0.256782	1.48743	0.987994	1.49558	1.06345	0.273518	-0.126234	-0.783728	0.97816	-0.558547	0.206593	-0.512619	0.790014	0.614831
	6	-1.12941	-0.310663	-0.256035	-0.236526	-0.00706842	-2.1643	-0.924619	-1.48726	-0.256141	0.642139	-0.449066	-0.698932	0.188048	-0.582092	-0.202554	0.995042	0.987994	1.0354	-0.507183	-0.181818	-0.126234	0.621129	0.97816	0.440593	0.206593	-0.838678	-0.753584	-0.572451
	7	0.239188	1.506	0.193587	1.59219	1.01078	0.753859	1.28985	-0.284084	0.81297	-0.795188	0.519705	0.676643	1.0477	-1.12114	-1.12123	0.0102582	-0.994879	0.115045	-0.507183	-0.181818	-0.126234	0.152843	-0.533701	-0.558547	-0.244156	-0.829713	-1.44132	-0.696997
	8	0.695388	0.143504	0.193587	0.220652	1.01078	0.753859	-0.371001	-0.284084	0.81297	0.642139	0.519705	1.59369	-0.241776	-0.0430486	-0.202554	0.50265	-0.00344249	0.575224	1.06345	0.728855	1.60497	0.621129	0.474206	-0.058977	-0.244156	-0.417954	-0.526662	-0.091595
	9	0.239188	1.05184	1.09283	-0.236526	-0.515994	-0.413406	0.736235	0.919095	-0.790697	0.642139	0.519705	0.676643	1.0477	0.495995	-0.202554	0.995042	0.492276	1.0354	0.0163607	0.728855	0.306568	0.621129	0.474206	0.440593	0.657342	-0.130416	-0.240746	-0.11453
	10	-0.217012	0.143504	-0.705658	-0.236526	-1.02492	0.170226	-0.371001	-0.885674	-1.32525	0.16303	0.519705	0.676643	1.0477	-0.0430486	-0.202554	-0.974526	-0.00344249	-0.805313	0.0163607	0.273518	-0.126234	0.621129	0.474206	-0.058977	-0.694905	-0.52484	-0.451834	-0.430451
	11	1.15159	-0.310663	-0.256035	-1.15088	-0.515994	-0.413406	-0.924619	-0.885674	-0.790697	-0.316079	-1.41784	-0.240407	-0.241776	-1.12114	-1.12123	-0.974526	-0.499161	-1.72567	-1.03073	-1.09249	-0.991837	-0.315443	-1.54161	-1.05812	-0.694905	-0.343374	-0.396411	-0.278307
	12	1.15159	0.597671	0.193587	-0.236526	0.501858	0.753859	0.182617	-0.284084	0.278414	1.12125	0.519705	0.676643	0.188048	-0.0430486	0.256782	0.995042	-0.00344249	1.0354	0.539905	0.273518	0.306568	0.621129	0.474206	-0.558547	0.206593	-0.395524	-0.375339	-0.164807
	13	-0.217012	0.597671	-0.705658	0.67783	-0.00706842	0.170226	0.182617	-0.284084	-0.256141	1.12125	1.00409	2.05222	1.47752	1.03504	1.63479	0.50265	0.987994	0.575224	0.539905	0.273518	0.306568	1.08942	0.97816	1.43973	0.657342	-0.379332	-0.43701	-0.447343
	14	1.15159	1.05184	1.54246	1.13501	-0.515994	0.753859	0.736235	1.52068	-0.790697	1.12125	1.00409	0.676643	0.188048	0.495995	1.63479	0.995042	0.492276	1.0354	0.539905	0.273518	-0.126234	1.08942	0.97816	-0.058977	-0.244156	0.180835	0.878411	0.27676
	15	0.239188	0.597671	-0.256035	-0.236526	-0.00706842	-0.413406	0.182617	-0.885674	-0.256141	-0.795188	-0.933451	-0.240407	-0.6716	-0.0430486	-0.66189	-0.974526	-0.00344249	-0.805313	0.0163607	0.728855	-0.126234	0.152843	-1.03765	-0.558547	-0.694905	-0.559924	-0.610384	-0.516249
	16	-0.673211	-0.764829	0.193587	-1.15088	-0.515994	-0.997039	0.182617	-0.885674	-0.790697	-1.75341	-0.933451	-1.15746	-1.10142	-1.12114	-1.12123	-1.95931	-0.994879	-1.72567	-2.07781	-1.54783	-0.991837	-0.315443	-1.03765	-1.55769	-1.5964	0.339988	0.456909	0.788554
	17	-2.04181	-0.764829	-0.705658	-0.693704	-2.04277	-2.1643	-1.47824	-1.48726	-2.39436	-1.2743	-1.41784	-1.61598	-1.53125	-1.66018	-2.0399	-1.95931	-1.4906	-1.72567	-1.55427	-1.09249	-1.85744	-1.25201	-1.54161	-2.05726	-1.14565	1.46066	1.86905	1.73037
	18	0.695388	-0.764829	-0.256035	-1.15088	-0.515994	1.33749	-0.371001	-0.885674	-0.790697	-0.316079	-0.449066	-0.698932	-0.241776	-0.0430486	-0.202554	0.995042	-0.00344249	1.0354	-1.55427	-1.54783	-1.85744	0.152843	-0.533701	-0.058977	0.206593	-0.463839	-0.65561	-0.0862135
	19	1.15159	-0.764829	-0.256035	-1.15088	-0.515994	-2.1643	-2.03185	-0.885674	-0.790697	-1.2743	-1.41784	-0.240407	-0.241776	-0.0430486	-0.66189	0.0102582	-0.00344249	-0.345134	-0.507183	-0.181818	-0.559035	-0.315443	-1.54161	-1.05812	-0.244156	-0.243921	-0.500292	-0.364778
	20	-1.12941	-0.764829	-0.256035	-0.693704	-2.04277	-2.1643	-1.47824	-1.48726	-2.39436	-0.316079	-0.933451	-0.698932	-1.53125	-0.582092	-1.12123	-1.46692	-0.994879	-1.26549	-2.07781	-2.00317	-0.991837	-1.25201	-1.03765	-0.558547	-1.14565	0.381536	0.410105	0.989156
	21	-1.12941	-2.12733	-2.05453	-1.60806	-1.02492	0.170226	0.182617	1.52068	-1.32525	-1.2743	-0.449066	-2.07451	-1.96107	-1.12114	-1.12123	-1.95931	-0.499161	-1.72567	-0.507183	-1.54783	-1.85744	-1.25201	-0.533701	-0.558547	-1.14565	1.34295	2.11197	2.73459
	22	-0.217012	-0.764829	-0.256035	-1.15088	-1.53385	-0.997039	-2.03185	-0.885674	-1.85981	-1.75341	-1.90222	-1.15746	-1.10142	-0.582092	-0.66189	-1.46692	-0.994879	-1.26549	-1.55427	0.273518	-0.126234	-1.25201	-2.04556	-2.05726	-1.14565	0.709638	0.161387	0.108127
	23	-0.673211	-0.310663	-0.256035	0.220652	-0.00706842	-0.413406	-0.924619	-0.885674	-0.256141	-1.75341	-1.90222	-1.15746	-1.10142	-1.66018	-1.58056	-1.95931	-1.98632	-1.72567	-1.03073	0.273518	-0.559035	-1.25201	-2.04556	-1.55769	-1.14565	-0.0119584	0.0388303	-0.201299
	24	1.60779	1.506	1.54246	2.04936	0.501858	1.33749	1.84347	1.52068	0.278414	0.642139	0.519705	1.59369	1.47752	-0.0430486	-0.202554	0.50265	-0.00344249	0.575224	1.06345	0.273518	0.306568	0.152843	0.474206	0.440593	1.55884	0.851752	-0.395321	0.796595
	25	0.239188	0.597671	1.54246	0.220652	-1.02492	0.753859	0.182617	-0.284084	-1.32525	0.642139	0.519705	-0.240407	1.0477	1.03504	1.63479	0.50265	0.987994	0.575224	-0.507183	0.728855	-0.559035	1.5577	0.474206	-0.058977	1.55884	0.19591	0.29776	-0.456023
	26	0.239188	1.506	1.54246	0.67783	1.51971	1.33749	1.28985	1.52068	1.34753	1.60036	1.48848	-0.240407	-0.6716	-0.0430486	-0.66189	1.48743	0.987994	1.49558	-1.55427	0.273518	-0.559035	1.08942	1.48211	0.440593	1.10809	0.778883	0.0318621	-0.554194
	27	-1.58561	-2.12733	-2.05453	-1.60806	1.01078	0.753859	-0.371001	-0.284084	0.81297	1.12125	0.519705	-0.698932	-0.6716	-0.0430486	0.716118	0.50265	-0.00344249	1.0354	1.06345	0.728855	0.306568	0.621129	0.474206	-0.558547	0.206593	-0.925021	-1.28588	-2.49785
	28	1.60779	0.143504	1.09283	1.13501	1.01078	1.33749	-0.371001	0.919095	0.81297	-0.316079	-0.449066	0.676643	1.0477	-1.12114	-0.66189	-0.974526	-0.994879	-0.805313	-1.03073	-1.54783	-0.559035	-1.25201	-0.533701	-1.05812	-1.14565	-1.69634	-1.73821	-1.76115
	29	-0.673211	1.05184	0.64321	1.13501	-0.515994	0.170226	0.736235	-0.284084	-0.790697	1.60036	0.0353198	-0.240407	0.188048	-0.0430486	-0.202554	0.995042	-0.00344249	0.115045	0.539905	0.273518	1.60497	1.08942	-0.0297472	-0.558547	-0.244156	-0.460067	-0.412154	-0.0627924
	30	-1.12941	-0.764829	-0.705658	-1.60806	1.01078	0.753859	0.736235	0.919095	0.81297	-1.2743	-1.41784	-1.15746	-1.96107	-0.0430486	-0.202554	-0.482134	-1.4906	-0.805313	-0.507183	-1.54783	-0.559035	-1.7203	-1.54161	-0.558547	-1.14565	1.11264	0.173795	0.641657
	31	-0.217012	1.506	1.54246	1.59219	-0.515994	0.170226	1.28985	1.52068	-0.790697	1.60036	0.0353198	0.676643	0.188048	-0.0430486	0.716118	0.995042	-0.00344249	1.0354	0.539905	0.728855	0.306568	0.621129	-0.0297472	1.43973	1.55884	0.696823	0.068849	0.487296
	32	-0.217012	0.597671	0.193587	-1.15088	-0.00706842	-0.997039	0.182617	1.52068	-0.256141	0.642139	-0.449066	-0.240407	0.188048	1.03504	1.63479	1.97983	0.987994	0.575224	1.06345	0.728855	0.306568	0.621129	-0.533701	0.940162	0.206593	-0.543678	-0.801738	-0.620672
	33	-0.673211	-0.310663	0.64321	-0.236526	1.01078	0.753859	0.182617	0.317506	0.81297	-1.2743	-1.41784	-0.240407	0.188048	-1.12114	-1.12123	-0.974526	-1.98632	-0.805313	-1.55427	-1.54783	-0.559035	-1.25201	-1.54161	-0.558547	-1.14565	-0.288552	-0.312569	-0.283969
	34	-0.217012	-0.310663	-1.15528	-1.60806	-0.515994	0.170226	0.182617	0.317506	-0.790697	0.642139	0.0353198	-1.15746	-1.53125	1.03504	-0.202554	-0.482134	0.987994	0.575224	-0.507183	-1.54783	-0.559035	1.08942	-0.0297472	-0.058977	-0.244156	-0.675143	-0.862249	-0.0643512
	35	-0.217012	-0.310663	-1.15528	-0.236526	-0.00706842	-0.997039	-0.371001	0.317506	-0.256141	0.642139	0.519705	-2.07451	-1.10142	-0.0430486	0.716118	1.97983	0.987994	1.95576	-1.03073	-1.54783	-1.85744	0.621129	0.474206	-0.558547	0.206593	-0.607095	-1.13545	-0.224609
	36	-0.673211	-0.310663	0.193587	-0.693704	-1.02492	0.753859	0.182617	0.317506	-1.32525	1.12125	1.00409	-0.240407	-0.6716	1.03504	0.716118	0.50265	0.987994	-0.345134	0.0163607	0.728855	-0.559035	1.08942	0.97816	0.440593	-0.244156	-0.759232	-0.935293	-0.458774
	37	-0.217012	1.05184	1.09283	1.13501	-0.515994	0.170226	0.736235	0.919095	-0.790697	0.16303	1.48848	1.13517	0.188048	-0.0430486	-0.202554	0.0102582	0.987994	0.115045	-0.507183	-0.181818	1.17217	1.5577	1.48211	0.940162	-0.244156	0.39477	-0.386919	-0.357859
	38	-2.04181	-0.310663	-0.705658	-0.693704	-1.02492	-2.1643	-0.924619	-1.48726	-1.32525	0.16303	0.0353198	-2.07451	-0.6716	0.495995	-0.66189	-0.974526	0.492276	0.115045	-1.03073	-2.00317	-1.85744	0.621129	-0.0297472	-0.558547	0.657342	-0.683402	-0.314914	0.846097
	39	-0.673211	0.597671	0.64321	-0.693704	1.01078	0.753859	0.182617	0.317506	0.81297	1.12125	1.00409	-0.240407	0.188048	0.495995	1.17545	0.0102582	0.492276	1.95576	1.06345	0.728855	0.306568	0.152843	0.97816	1.43973	1.10809	-0.525712	-0.574528	-0.538382
	40	-0.673211	1.05184	0.64321	0.67783	1.01078	0.753859	0.736235	0.317506	0.81297	-1.2743	0.0353198	-0.240407	0.188048	1.03504	-0.202554	0.0102582	0.987994	0.115045	-1.03073	-2.00317	-1.42464	-0.315443	-0.0297472	-1.55769	-0.694905	-0.832154	-0.323126	-1.05548
	41	1.15159	0.597671	1.54246	1.59219	1.01078	0.753859	0.182617	0.317506	0.81297	1.12125	1.00409	1.13517	0.188048	1.03504	0.716118	1.97983	0.987994	1.95576	-1.03073	0.728855	1.17217	0.152843	0.97816	-0.558547	0.206593	-0.178971	1.30816	0.690521
	42	0.695388	0.597671	0.64321	0.67783	-1.02492	0.170226	0.182617	0.317506	-1.32525	0.642139	0.519705	1.59369	1.0477	0.495995	1.17545	0.995042	0.492276	1.0354	0.539905	0.273518	1.60497	1.08942	0.474206	0.940162	1.10809	0.221948	0.11516	0.272116
	43	1.15159	0.597671	0.64321	1.59219	1.01078	0.753859	0.736235	0.317506	0.81297	1.12125	1.00409	0.218118	0.188048	0.495995	-0.202554	0.995042	0.492276	1.0354	-1.03073	0.273518	1.17217	1.08942	0.97816	1.43973	0.206593	0.643103	0.0196485	-0.0128581
	44	1.15159	0.597671	1.09283	-0.236526	1.01078	0.753859	0.736235	0.919095	0.81297	1.12125	1.00409	1.13517	0.188048	1.03504	0.716118	1.97983	0.987994	-0.805313	-0.507183	-1.09249	-0.991837	0.621129	0.97816	0.940162	0.206593	0.0667882	0.451624	-1.22603
	45	-1.12941	-0.764829	-2.05453	-1.15088	-0.00706842	0.170226	-1.47824	-0.284084	-0.256141	-1.75341	-1.90222	-1.61598	-1.96107	-1.12114	-1.58056	-0.974526	-1.98632	-0.805313	-1.55427	-1.09249	-0.559035	-0.783728	-2.04556	-2.05726	-0.694905	1.7247	1.71795	1.1979
	46	-1.58561	-0.310663	-0.705658	-1.15088	-0.515994	0.170226	-0.371001	-0.284084	-0.790697	0.16303	1.48848	-1.15746	-1.96107	-1.12114	-0.66189	-0.974526	-0.994879	-1.72567	0.0163607	0.728855	1.17217	1.08942	1.48211	0.440593	1.10809	-1.69361	0.559718	-0.387776
	47	1.15159	0.143504	1.54246	1.59219	1.51971	0.753859	-0.371001	0.317506	1.34753	1.12125	1.00409	0.218118	1.0477	1.03504	0.716118	1.97983	0.987994	1.95576	1.58699	0.273518	0.306568	1.5577	0.97816	0.440593	1.55884	1.02409	1.12787	1.15641
	48	0.695388	0.597671	1.09283	1.13501	1.01078	0.753859	0.182617	0.919095	0.81297	1.12125	1.00409	0.676643	0.188048	1.03504	0.716118	1.48743	0.987994	1.49558	1.58699	0.273518	0.306568	1.5577	0.97816	0.940162	1.55884	0.852746	0.638355	0.66235
	49	-2.04181	-1.219	-0.705658	-0.693704	-1.02492	0.170226	0.182617	-1.48726	-1.32525	-1.2743	-1.41784	-0.698932	-1.53125	1.03504	-0.66189	-0.974526	-0.00344249	-0.805313	-1.03073	-0.637155	-0.991837	-2.18859	-1.54161	-2.05726	-2.04715	2.31898	-0.270217	0.868362
	50	-0.217012	0.143504	1.09283	1.13501	-1.02492	0.170226	-0.371001	0.317506	0.278414	0.16303	0.519705	0.218118	0.188048	1.03504	0.256782	0.50265	0.987994	0.575224	-0.507183	1.18419	-0.559035	0.152843	0.474206	0.440593	-0.244156	-0.35641	-0.0965996	-0.400115
	51	-0.217012	0.143504	0.193587	-0.693704	-0.00706842	-0.997039	-1.47824	-1.48726	-0.790697	-0.316079	-1.41784	-1.15746	-0.6716	-0.582092	-1.12123	-0.974526	-0.499161	-0.805313	-1.03073	1.18419	-0.559035	-0.315443	-1.54161	-0.558547	0.206593	-0.396854	-0.413415	-0.425088
	52	-0.217012	-0.310663	-0.256035	-0.236526	-0.00706842	-0.997039	-1.47824	-0.885674	-0.790697	-1.2743	-1.41784	-0.240407	-0.6716	-1.12114	-2.0399	-1.95931	-0.994879	-0.805313	-0.507183	-1.09249	-0.559035	-1.25201	-1.54161	-0.558547	-0.244156	-0.208261	-0.0486724	-0.25337
	53	-1.12941	-0.764829	-1.15528	-1.15088	-1.02492	-0.997039	-1.47824	-2.08885	-0.790697	-0.795188	-1.41784	-1.15746	-1.96107	-1.12114	-1.58056	-0.974526	-1.98632	-0.805313	-1.03073	1.18419	0.306568	-0.783728	-1.54161	-0.058977	-1.14565	0.662055	1.32044	-0.214231
	54	-0.673211	-0.764829	-1.15528	-1.15088	-1.02492	-1.58067	-1.47824	-2.08885	-1.32525	0.16303	1.97286	-1.15746	-1.53125	-0.0430486	-0.202554	-0.974526	0.492276	-0.805313	-0.507183	1.18419	-0.559035	2.02599	1.98607	1.43973	1.10809	-2.39098	-0.303118	-0.163843
	55	1.15159	1.506	0.64321	0.67783	1.01078	0.170226	1.84347	1.52068	0.278414	-1.2743	-0.449066	1.13517	0.188048	1.57408	2.09413	0.0102582	1.48371	0.115045	-0.507183	-0.637155	-0.559035	-1.25201	-0.533701	0.940162	0.206593	-0.694094	1.05348	-0.981429
	56	1.60779	1.96017	0.64321	0.67783	2.02864	1.33749	1.84347	1.52068	1.34753	2.07947	1.97286	2.05222	1.90734	2.11312	2.09413	0.995042	1.97943	1.95576	2.11054	1.18419	1.17217	2.02599	1.98607	1.43973	1.10809	2.01218	2.2385	2.23143
	57	2.06399	1.96017	1.99208	2.04936	1.51971	1.92112	1.84347	2.12227	1.88208	0.16303	0.519705	2.05222	1.47752	1.57408	2.09413	0.995042	1.97943	1.0354	2.11054	1.18419	1.60497	0.152843	0.474206	0.940162	1.10809	1.16359	3.68053	3.49429
	58	1.60779	1.506	0.64321	0.67783	2.02864	1.33749	1.84347	2.12227	1.34753	2.07947	1.97286	1.13517	1.90734	0.495995	1.63479	1.97983	0.492276	1.95576	2.11054	1.18419	1.60497	2.02599	1.98607	1.9393	2.00959	2.247	1.14518	2.12425
	59	1.60779	1.96017	0.64321	0.220652	2.02864	1.33749	1.84347	0.919095	1.34753	0.16303	1.48848	1.59369	1.90734	2.11312	1.63479	0.995042	1.97943	1.0354	1.58699	1.18419	1.60497	0.152843	1.48211	1.9393	1.10809	1.1482	1.81859	1.5163
	60	-2.04181	-2.12733	-2.05453	-2.06524	-1.53385	-0.997039	-0.371001	-1.48726	-0.790697	0.642139	1.00409	-1.15746	-1.96107	-2.19922	-0.66189	-0.974526	-1.4906	-0.805313	0.539905	-0.181818	-0.126234	0.621129	0.97816	1.43973	2.00959	-3.71501	2.90789	-0.0450615
	61	-2.04181	-2.12733	-2.05453	-0.236526	-0.00706842	0.170226	0.182617	-0.885674	0.278414	0.642139	0.0353198	-1.15746	-1.53125	-1.66018	-2.0399	-0.974526	-1.4906	-0.805313	0.539905	0.728855	0.306568	0.621129	-0.0297472	0.940162	0.657342	-1.56765	2.62472	-0.760355
	62	-0.673211	1.05184	0.193587	0.220652	1.01078	1.92112	0.736235	0.317506	1.88208	0.16303	1.00409	-0.240407	-0.241776	-0.0430486	1.17545	0.0102582	0.987994	1.0354	1.06345	0.728855	0.306568	0.152843	0.97816	0.940162	1.55884	-0.266914	-0.420499	-0.280889
	63	-1.12941	-0.764829	-1.15528	-0.236526	1.01078	0.753859	0.736235	-0.284084	0.81297	-0.795188	-0.933451	-0.698932	-1.53125	-0.0430486	0.716118	-0.974526	-0.00344249	-0.805313	0.539905	0.273518	0.306568	-0.783728	-1.03765	-0.558547	-1.5964	0.514615	-0.455072	-0.53229
	64	0.239188	0.597671	0.193587	0.220652	1.51971	1.33749	0.736235	-0.284084	1.34753	0.16303	0.0353198	0.218118	1.0477	-2.19922	-1.58056	-0.974526	-1.98632	-1.26549	-0.507183	-1.09249	-1.42464	0.152843	-0.0297472	0.940162	1.10809	-0.289146	-1.22651	-0.951721
	65	0.695388	1.96017	1.99208	2.04936	-0.515994	0.170226	1.84347	0.317506	0.278414	1.60036	0.519705	0.218118	1.90734	2.11312	0.716118	0.995042	1.97943	1.0354	0.0163607	1.18419	1.60497	1.5577	0.474206	1.9393	1.55884	2.31085	2.48179	1.57523
	66	-0.673211	0.143504	-0.705658	-0.693704	-2.04277	-1.58067	-0.371001	-1.48726	-1.32525	-1.75341	-1.90222	-0.698932	-0.6716	-1.12114	-1.58056	-1.46692	-0.499161	-1.72567	-1.03073	-1.09249	-1.42464	-1.7203	-2.04556	-1.55769	-1.14565	0.459117	0.164527	0.352594
	67	1.15159	1.506	0.64321	0.67783	-0.00706842	1.92112	1.84347	0.317506	1.88208	1.12125	0.0353198	1.59369	1.47752	2.11312	0.256782	0.995042	1.97943	1.0354	0.0163607	0.728855	1.60497	1.08942	-0.0297472	1.43973	2.00959	0.862298	1.11545	0.621948
	68	1.15159	1.05184	0.193587	0.220652	-0.00706842	0.753859	0.736235	-0.284084	0.81297	1.12125	-0.449066	0.218118	1.0477	1.03504	-0.202554	-0.482134	0.987994	0.115045	0.539905	-0.181818	-0.126234	1.08942	-0.533701	-0.058977	-0.244156	-0.461435	-0.307706	-0.402677
	69	0.239188	-0.310663	0.64321	0.67783	-0.00706842	0.170226	0.182617	0.317506	0.278414	0.642139	1.48848	1.59369	0.188048	-0.0430486	-0.66189	-1.95931	-1.4906	-0.805313	0.0163607	1.18419	-0.559035	0.621129	1.48211	0.940162	1.10809	-0.102137	-0.971727	-0.554818
	70	-1.12941	-1.219	-0.705658	-0.693704	-1.02492	0.170226	-0.371001	-0.284084	0.278414	-0.795188	-1.41784	-1.15746	-0.6716	-0.0430486	-0.66189	-0.974526	-1.98632	-0.805313	-2.07781	-0.637155	-1.42464	-1.25201	-1.54161	-0.558547	-1.14565	0.819986	0.543977	1.07686
	71	-0.217012	-1.219	-0.705658	-0.693704	-1.02492	0.170226	-0.371001	-1.48726	0.278414	-1.2743	-0.933451	-0.698932	-0.241776	-2.19922	-1.58056	-0.482134	0.492276	-0.345134	-1.03073	-1.09249	-0.991837	-1.25201	-1.03765	-1.05812	-1.5964	0.585038	0.297057	0.286992
	72	1.15159	0.597671	0.193587	0.220652	-0.515994	0.753859	0.182617	-0.284084	0.81297	1.12125	0.0353198	1.13517	0.188048	0.495995	0.716118	-0.482134	0.492276	-0.345134	-0.507183	-0.637155	-1.42464	1.08942	-0.0297472	0.440593	-0.244156	-0.292666	-0.359642	-1.01179
	73	1.15159	1.05184	0.64321	0.67783	0.501858	0.753859	0.736235	0.317506	0.81297	0.642139	1.00409	1.13517	0.617872	0.495995	-0.66189	0.0102582	0.492276	0.115045	1.06345	1.18419	1.60497	1.08942	0.97816	0.940162	0.657342	0.505811	-0.479705	0.59938
	74	0.239188	-0.310663	-1.15528	-1.15088	-0.00706842	-0.413406	0.182617	-0.284084	-0.256141	-0.795188	0.0353198	-0.240407	-0.241776	0.495995	0.716118	-0.974526	0.492276	-0.805313	0.539905	1.18419	1.60497	-0.783728	-0.0297472	-0.058977	-0.694905	-0.222368	-0.667553	-0.905061
	75	-1.12941	-0.764829	-1.6049	-0.693704	-0.515994	0.170226	-0.371001	-0.885674	0.278414	-0.316079	1.00409	-2.07451	-0.6716	0.495995	-0.66189	0.995042	0.492276	1.0354	0.539905	0.728855	-0.126234	-0.315443	0.97816	-0.058977	-0.244156	-0.643978	-1.00987	-1.29632
	76	-0.217012	0.143504	0.193587	-0.693704	0.501858	0.170226	-0.371001	-0.284084	0.278414	0.642139	0.0353198	-0.240407	-0.241776	-0.0430486	-0.66189	-0.482134	0.492276	-0.345134	-0.507183	0.728855	0.306568	0.621129	-0.0297472	0.940162	0.657342	-0.587833	-0.522392	-0.497436
	77	-0.673211	-1.219	-0.705658	-0.693704	-0.00706842	0.753859	-0.371001	-1.48726	0.81297	-1.2743	-0.449066	-1.61598	-1.53125	-0.0430486	-0.66189	-0.974526	-0.00344249	-0.805313	-1.03073	-1.09249	-1.42464	-1.25201	-0.533701	-0.058977	0.206593	-0.0800361	-0.0847882	0.679141
	78	0.239188	0.143504	0.193587	-1.15088	1.01078	0.753859	-0.371001	-0.284084	0.81297	-1.2743	-0.449066	0.218118	-0.241776	0.495995	-0.202554	0.995042	0.492276	1.0354	0.539905	-0.181818	-0.126234	-1.25201	-0.533701	-0.058977	-0.694905	-0.391241	-0.635943	-0.571273
	79	1.15159	1.05184	0.64321	-0.236526	0.501858	0.753859	0.736235	-0.284084	0.81297	-0.316079	-0.449066	1.59369	0.188048	0.495995	-0.202554	0.995042	0.492276	1.0354	-0.507183	-1.09249	-1.42464	0.621129	-0.533701	0.440593	-0.694905	-0.541277	-0.171682	-0.835412
	80	-1.12941	-0.764829	0.64321	-0.693704	-1.02492	0.170226	-1.47824	-1.48726	-0.790697	-1.2743	-0.449066	-1.15746	-0.241776	0.495995	0.256782	-0.974526	0.492276	-0.345134	-1.03073	-1.09249	-1.42464	-1.7203	-0.533701	-2.05726	-1.5964	0.386753	-0.57655	0.110462
	81	-0.217012	-0.310663	-0.705658	-0.236526	-1.53385	-0.997039	-1.47824	-1.48726	0.278414	1.12125	1.00409	-0.698932	0.617872	-1.12114	1.17545	-0.482134	0.987994	-0.345134	-0.507183	1.18419	1.60497	1.08942	0.97816	0.940162	0.206593	-0.861602	-0.619663	-0.685879
	82	-0.673211	-0.764829	-0.705658	-0.693704	-1.53385	-1.58067	-1.47824	-1.48726	-1.32525	-0.795188	-0.933451	-0.698932	-0.241776	-0.582092	-0.66189	-0.482134	0.492276	-0.345134	-1.03073	-2.00317	-1.42464	0.152843	-1.03765	-1.55769	-1.5964	0.395527	-0.264754	0.553595
	83	0.239188	-0.764829	-1.15528	-0.236526	-1.53385	-0.413406	-1.47824	-2.08885	-0.256141	-1.2743	-0.449066	-1.15746	-0.6716	-0.0430486	-0.66189	-0.482134	-1.4906	-0.345134	-1.55427	-2.00317	-0.991837	0.621129	-0.533701	-0.558547	-1.5964	-0.187159	-0.150832	0.234925
	84	-0.217012	-0.764829	-0.256035	0.220652	0.501858	0.170226	-0.371001	-0.885674	0.278414	-0.795188	-0.449066	-0.698932	0.188048	-0.582092	-0.202554	0.995042	0.492276	1.0354	-0.507183	0.728855	1.17217	-0.783728	-0.533701	-0.058977	-1.14565	-0.294873	-0.623796	-0.709909
	85	0.239188	-0.310663	-0.705658	-0.693704	0.501858	0.170226	0.182617	0.317506	0.278414	-0.795188	-0.449066	-0.240407	0.188048	1.57408	-0.202554	0.50265	1.48371	0.575224	0.539905	-0.181818	1.60497	-0.783728	-0.533701	-0.558547	-0.694905	-0.209927	-0.932531	-0.820016
	86	-0.217012	0.597671	-0.256035	-0.236526	-0.00706842	-0.997039	0.182617	-0.885674	-0.790697	-1.2743	-0.449066	-0.240407	0.188048	1.03504	-0.202554	0.50265	0.987994	0.575224	0.539905	0.728855	-0.126234	-1.25201	-0.533701	-0.058977	-1.5964	-0.474195	-0.572211	-0.513268
	87	-0.217012	-0.310663	0.193587	-0.693704	-1.53385	-0.997039	0.182617	-1.48726	-0.790697	-0.795188	-0.933451	-0.240407	0.617872	-1.66018	-1.58056	-0.974526	-1.4906	-0.805313	0.0163607	0.273518	-0.559035	-0.783728	-1.03765	-0.558547	-1.14565	-0.216603	-0.0940373	-0.393522
	88	-0.217012	-0.764829	-1.15528	-0.236526	0.501858	-0.997039	0.736235	-0.284084	-0.790697	-0.316079	-0.933451	0.218118	0.617872	-1.12114	-0.66189	-0.482134	-0.00344249	-0.345134	0.0163607	1.18419	1.60497	-0.315443	-1.03765	-1.55769	-0.244156	0.091458	-0.126458	-0.91084
	89	-1.12941	-0.764829	-1.6049	-1.15088	-0.515994	0.753859	0.182617	-0.885674	0.81297	0.642139	-0.933451	-2.07451	-1.53125	1.57408	1.17545	0.0102582	1.97943	0.115045	0.0163607	0.728855	1.17217	-0.783728	-1.03765	-1.05812	0.206593	0.474776	-2.24528	-1.21392
	90	-1.12941	-2.12733	-1.6049	-1.15088	-1.02492	0.170226	0.182617	-0.885674	0.278414	-0.795188	-0.933451	-2.07451	-1.53125	0.495995	0.716118	-0.482134	0.492276	-0.345134	-1.03073	-0.637155	-1.42464	-0.783728	-1.03765	-0.558547	-0.694905	0.947189	-1.10293	1.19133
	91	-0.217012	-1.219	-1.15528	-1.15088	-0.00706842	-0.997039	-0.371001	-0.284084	-0.790697	-0.795188	-1.41784	-0.240407	0.188048	-0.0430486	-0.202554	-0.974526	-1.4906	-0.805313	-1.55427	0.273518	-1.42464	-0.783728	-1.54161	-0.558547	-0.694905	0.554317	0.256505	0.664827
	92	-0.673211	-1.219	-0.705658	-0.693704	-2.04277	-1.58067	-0.371001	-1.48726	-1.32525	-0.795188	-0.933451	-0.698932	-0.6716	-0.582092	0.716118	0.0102582	0.492276	0.115045	-1.03073	-1.54783	-0.559035	-1.7203	-1.03765	-1.05812	-1.5964	0.873573	-0.729327	0.24927
	93	0.695388	1.506	1.54246	1.59219	1.01078	1.33749	1.28985	0.317506	1.34753	1.12125	1.48848	1.59369	1.0477	0.495995	1.63479	-0.482134	0.492276	1.0354	-1.03073	1.18419	2.03777	1.08942	1.48211	0.940162	1.10809	1.41576	0.322096	0.842387
	94	0.239188	-0.764829	0.193587	-0.693704	1.51971	1.92112	0.736235	1.52068	1.88208	-0.795188	-0.449066	-0.240407	-0.6716	-0.0430486	-0.202554	-0.974526	-0.499161	-0.805313	-1.03073	-2.00317	-1.42464	-0.783728	-0.533701	-1.55769	-0.244156	-0.248178	-0.409169	-0.0691186
	95	-0.217012	-0.310663	0.193587	1.59219	-1.02492	-0.997039	0.182617	0.317506	-0.790697	0.16303	1.48848	-0.240407	1.0477	-0.0430486	-0.202554	-0.974526	-0.00344249	-0.805313	0.0163607	1.18419	1.60497	0.152843	1.48211	1.9393	1.10809	-0.0550109	-0.684014	-0.348946
	96	-1.12941	-0.764829	-0.705658	-0.693704	-0.00706842	0.170226	1.28985	0.317506	0.278414	0.642139	-0.449066	-0.698932	-0.6716	1.57408	0.256782	0.0102582	1.48371	0.115045	1.58699	1.18419	0.306568	0.621129	-0.533701	-1.05812	-0.244156	-0.173406	-1.39027	-1.34164
	97	-1.12941	-0.310663	-1.15528	-1.15088	1.01078	0.170226	-0.924619	-0.284084	0.278414	-2.23252	-0.933451	-0.698932	-0.241776	-1.12114	-0.202554	-0.482134	-0.499161	-0.345134	-1.03073	0.273518	-0.991837	-0.315443	-1.03765	-1.55769	-2.04715	0.92607	0.116757	0.188652
	98	-0.673211	0.597671	-1.15528	-1.15088	-0.515994	0.753859	0.182617	-0.284084	0.81297	-1.75341	-0.933451	-0.698932	-0.241776	-0.582092	-1.58056	-0.974526	-0.499161	-0.805313	0.539905	0.728855	-0.126234	-1.7203	-1.03765	-1.05812	-2.04715	0.54386	0.129069	-0.514444
	99	-0.673211	-1.219	-1.6049	-2.06524	1.01078	1.33749	0.736235	0.317506	1.34753	-0.795188	-0.933451	-0.698932	-1.53125	1.03504	-0.202554	-0.974526	0.987994	-0.805313	0.539905	1.18419	-0.126234	-2.18859	-1.03765	-2.05726	-1.5964	2.40909	-0.838179	-0.70098
	100	0.239188	0.597671	-0.705658	0.67783	-0.515994	-0.413406	0.182617	1.52068	0.278414	-0.316079	0.519705	-0.698932	-1.10142	-0.582092	-0.202554	0.0102582	-0.499161	-0.345134	0.539905	0.728855	-0.126234	-0.783728	-1.03765	0.440593	-0.694905	-0.630108	-0.636934	-0.458444
	101	-1.12941	-0.310663	0.64321	0.67783	1.01078	1.33749	0.182617	1.52068	0.278414	0.642139	-1.41784	-1.15746	-1.10142	0.495995	0.716118	-0.482134	-0.499161	0.575224	1.06345	0.273518	-0.126234	0.621129	-0.0297472	-1.55769	-0.244156	-0.481061	-0.559479	-0.52692
	102	-1.58561	-1.219	-1.15528	-1.15088	1.51971	0.170226	0.736235	-0.284084	0.81297	-0.316079	-1.41784	-0.698932	-0.6716	-0.582092	-0.202554	-0.482134	-0.499161	-0.345134	-0.507183	-0.637155	-0.991837	-0.315443	-0.0297472	-1.55769	-0.244156	0.33912	0.161242	0.521934
	103	-0.673211	-0.764829	-0.705658	0.220652	-1.53385	-1.58067	-1.47824	-0.284084	-1.32525	0.16303	1.97286	-1.15746	-0.241776	-1.66018	-1.12123	0.0102582	-0.499161	-1.26549	0.539905	-0.181818	-0.126234	0.152843	0.97816	1.9393	1.10809	-1.12778	-0.0637346	-0.304261
	104	0.239188	0.143504	1.54246	1.59219	1.01078	1.92112	-0.371001	1.52068	-0.256141	1.12125	1.97286	1.13517	1.0477	1.57408	0.256782	-0.482134	-0.499161	0.115045	0.0163607	-0.181818	-0.126234	-0.315443	0.474206	1.9393	0.206593	0.127483	-0.349416	-0.532644
	105	-0.673211	-1.219	-1.15528	-1.15088	-0.00706842	-1.58067	-2.03185	-0.284084	-1.85981	0.642139	-0.449066	-1.15746	-0.6716	-1.12114	-1.12123	-1.46692	-1.4906	-1.26549	-0.507183	-0.637155	-1.42464	-0.783728	-0.0297472	-0.558547	-0.694905	0.155194	1.19282	0.868173
	106	-1.58561	-0.310663	-1.15528	0.220652	-1.02492	-0.997039	0.182617	-0.284084	0.278414	-0.795188	-1.41784	-1.61598	-0.241776	-2.19922	-0.202554	-1.46692	-1.4906	-0.345134	-0.507183	1.18419	0.306568	-0.783728	-0.533701	-0.558547	-0.694905	0.0636152	0.646779	-0.568701
	107	1.15159	0.143504	0.193587	0.220652	1.01078	0.753859	-0.371001	-0.284084	-0.256141	-0.795188	0.519705	0.218118	-0.241776	-0.0430486	-0.202554	0.995042	-0.499161	-0.345134	1.06345	1.18419	-0.126234	-0.783728	-0.0297472	0.440593	-0.694905	-0.631142	-0.505602	-0.281083
	108	1.60779	1.506	0.193587	0.220652	-0.00706842	0.170226	1.84347	1.52068	1.88208	-0.795188	1.97286	1.59369	0.617872	-0.0430486	-0.66189	0.50265	-0.994879	-0.805313	-0.507183	0.273518	-0.991837	-0.783728	-0.533701	0.440593	-1.14565	-1.0491	-0.87141	-1.16415
	109	-1.58561	-1.219	-2.05453	-1.60806	-1.53385	-0.997039	-0.924619	-0.885674	-0.790697	-0.316079	1.48848	-1.61598	-1.10142	-1.12114	-0.202554	-0.482134	-0.499161	-0.345134	1.58699	0.273518	0.306568	-0.315443	-0.533701	1.43973	1.10809	-1.30652	0.611188	-1.45552
	110	0.239188	1.506	0.64321	-0.236526	1.51971	0.753859	1.28985	1.52068	1.34753	-1.2743	1.00409	0.676643	0.188048	-0.0430486	-0.202554	-0.482134	-0.499161	-0.345134	-1.03073	-0.181818	-0.126234	-1.25201	-0.533701	0.940162	0.657342	-0.530419	-0.776007	-0.825755
	111	-0.673211	-0.764829	-0.705658	0.67783	1.01078	0.753859	0.736235	1.52068	0.81297	0.16303	0.0353198	0.676643	-0.241776	-0.582092	0.716118	-0.482134	-0.499161	0.575224	1.06345	0.273518	0.306568	0.152843	-0.533701	-0.058977	-1.14565	-0.310688	-0.458072	-0.792235
	112	0.239188	0.143504	0.193587	0.67783	-1.53385	-0.413406	-0.371001	-0.284084	-0.256141	0.642139	1.00409	0.676643	0.617872	-0.582092	0.256782	0.0102582	-0.00344249	0.115045	0.0163607	0.273518	-0.126234	0.621129	0.474206	0.940162	-0.694905	-0.365834	-0.584918	-0.474701
	113	0.695388	-0.310663	0.193587	-0.693704	-0.515994	0.170226	-0.371001	-0.284084	-0.256141	0.642139	-0.933451	-0.240407	-1.53125	-0.0430486	-0.202554	0.50265	0.492276	-0.345134	-0.507183	0.273518	-0.991837	0.621129	0.474206	-1.05812	-0.244156	-0.494789	-0.563516	-0.486221
	114	0.239188	-0.310663	-0.256035	-0.236526	-1.02492	-0.413406	-0.924619	-0.885674	-0.790697	0.642139	0.519705	-0.240407	-0.6716	-0.582092	-0.202554	0.0102582	-0.499161	-0.345134	1.06345	1.63953	-0.126234	0.621129	0.474206	0.440593	-0.244156	-0.553004	-0.502207	-0.590533
	115	-1.12941	-1.67316	-1.15528	0.220652	0.501858	-0.997039	0.182617	0.317506	0.278414	0.642139	1.00409	-0.240407	-1.10142	-0.0430486	-0.202554	0.995042	0.987994	-0.345134	0.539905	-0.181818	-0.126234	0.621129	0.474206	-0.058977	0.657342	-0.989062	-1.09518	-0.467238
	116	-1.58561	-1.67316	-1.15528	0.220652	-0.515994	0.170226	0.182617	1.52068	0.278414	-0.316079	-1.90222	-0.240407	0.188048	-1.12114	0.716118	0.50265	0.492276	0.575224	0.539905	0.728855	-0.126234	-0.315443	-2.04556	-2.05726	-0.244156	1.07195	-0.788573	-1.11237
	117	0.239188	1.05184	0.193587	0.220652	0.501858	-0.413406	0.736235	1.52068	0.81297	0.642139	0.0353198	-0.240407	0.617872	-0.582092	-0.66189	0.0102582	-0.00344249	-0.805313	0.539905	0.728855	-0.126234	0.621129	0.97816	1.43973	0.657342	0.000551201	-0.725149	-0.491125
	118	0.239188	-0.310663	-0.256035	-0.236526	-0.00706842	-0.413406	0.182617	0.317506	0.278414	-0.316079	-0.449066	0.676643	-0.241776	-1.66018	-0.66189	0.50265	-0.499161	-0.805313	1.58699	1.63953	0.306568	-0.315443	-0.533701	-0.558547	0.206593	-0.442811	-0.459631	-0.609832
	119	-2.04181	-1.67316	-1.15528	-1.15088	-0.515994	-0.413406	-0.371001	0.317506	-0.256141	-0.795188	0.0353198	-1.61598	-1.10142	-1.12114	-1.58056	-0.482134	-0.499161	-1.72567	-0.507183	0.273518	0.306568	-0.783728	-0.0297472	-1.05812	-2.04715	1.28595	1.21358	0.557387
	120	-0.673211	-0.764829	-0.256035	-0.236526	-1.02492	-1.58067	-1.47824	-0.885674	-1.32525	-2.23252	-1.41784	-1.15746	-0.6716	-2.19922	0.256782	-0.482134	-0.499161	0.115045	1.58699	1.63953	1.17217	-0.783728	-0.533701	-1.55769	-0.694905	0.0372988	-0.117382	-1.19024
	121	-0.217012	-1.67316	-2.05453	-2.06524	-1.02492	-0.997039	-0.371001	-0.885674	-0.256141	-0.316079	-0.933451	-1.15746	-0.6716	-0.0430486	0.256782	0.0102582	-0.499161	0.115045	0.539905	-0.181818	0.306568	-0.315443	-0.0297472	-0.058977	0.657342	-0.61033	-0.442268	-0.927417
	122	-0.673211	-1.219	0.64321	-0.236526	-1.02492	-1.58067	-2.03185	-0.885674	-1.85981	-0.795188	0.0353198	1.13517	0.188048	0.495995	0.256782	-0.482134	-0.499161	0.115045	1.58699	0.273518	-0.991837	-0.783728	-0.533701	-0.058977	-0.694905	-0.252816	-0.523857	-0.641742
	123	-0.673211	-0.764829	-0.256035	-1.60806	-0.515994	-1.58067	-1.47824	-2.08885	-1.32525	1.60036	1.48848	-0.240407	-0.241776	-0.0430486	-0.66189	0.50265	-1.4906	-0.805313	0.0163607	0.728855	-0.126234	1.5577	1.48211	0.940162	1.10809	-1.78977	-0.145108	-0.367961
	124	-0.673211	0.143504	0.193587	0.220652	-0.515994	-1.58067	-0.371001	-0.284084	-0.256141	-0.795188	0.0353198	-1.15746	-0.241776	-1.66018	-0.66189	0.50265	-0.499161	-0.805313	-2.07781	-1.54783	-1.42464	-2.18859	-0.533701	-0.058977	-0.694905	-0.463957	-0.535672	-0.442039
	125	-0.217012	-1.219	-1.6049	-0.236526	-1.02492	-0.997039	-2.03185	-0.885674	-1.85981	-1.75341	-0.449066	-1.61598	-0.6716	-0.582092	0.256782	-1.46692	-1.4906	-0.805313	0.0163607	0.273518	-0.559035	-1.7203	-0.533701	-1.05812	-2.04715	0.839294	0.312516	-0.155779
	126	0.239188	-0.310663	-1.6049	-0.236526	-0.00706842	-0.413406	-0.924619	-0.885674	-0.790697	0.16303	0.0353198	-0.698932	-0.6716	0.495995	-0.202554	0.0102582	-0.00344249	-0.345134	-1.03073	-0.181818	-0.559035	-0.783728	0.474206	-0.058977	-1.14565	-0.290207	-0.598053	-0.156983
	127	0.239188	1.506	1.09283	1.59219	1.01078	0.753859	1.84347	-0.284084	1.88208	0.16303	-0.449066	0.676643	-0.241776	-0.0430486	0.716118	0.0102582	-0.499161	0.575224	0.0163607	0.728855	0.306568	0.152843	0.474206	-0.558547	-0.244156	-0.542006	-0.476777	0.0822615
	128	0.239188	1.506	1.09283	1.59219	1.51971	0.753859	1.28985	-0.284084	1.34753	-1.2743	-0.449066	-0.240407	1.47752	-0.0430486	-1.12123	0.0102582	-0.499161	-1.26549	0.0163607	0.728855	-0.559035	-1.25201	-0.533701	-0.558547	-1.5964	-1.82117	-1.13662	-1.03508
	129	1.60779	0.597671	1.09283	1.59219	1.51971	1.33749	0.182617	-0.284084	0.278414	-1.2743	-0.449066	0.218118	0.188048	1.57408	0.716118	0.0102582	-0.499161	0.575224	1.58699	-0.181818	-0.126234	-1.25201	-0.0297472	-0.558547	-0.694905	-1.41957	0.126167	0.353644
	130	0.239188	-0.310663	1.09283	1.59219	-0.00706842	-0.413406	0.182617	-0.885674	0.278414	0.16303	-0.449066	0.218118	1.47752	-0.0430486	0.716118	0.50265	-0.499161	0.575224	0.0163607	-1.09249	0.306568	0.152843	-0.0297472	-0.558547	-0.694905	-0.715875	-0.40055	-0.474836
	131	-0.217012	1.05184	0.193587	0.220652	-0.515994	-0.997039	0.736235	-0.284084	0.81297	0.16303	1.00409	-0.240407	-0.241776	0.495995	-0.66189	0.50265	0.492276	0.115045	0.539905	0.728855	-0.559035	-1.7203	-1.03765	0.940162	-0.694905	-0.74269	-0.47414	-0.419851
	132	-0.217012	1.05184	0.64321	-0.236526	-1.02492	-0.997039	0.736235	0.317506	0.81297	-0.316079	-0.933451	0.676643	1.47752	-0.0430486	0.256782	0.0102582	-0.00344249	0.115045	-0.507183	-0.637155	-0.126234	-0.315443	-1.54161	0.940162	0.657342	-0.534776	-0.533788	-0.610045
	133	-0.673211	0.143504	0.193587	0.220652	-0.00706842	-0.413406	-0.371001	-0.284084	-0.256141	-0.795188	-0.449066	-0.240407	0.188048	0.495995	0.256782	0.50265	-0.994879	0.115045	1.06345	-0.637155	0.306568	-0.783728	-0.0297472	-0.558547	-0.694905	-0.477176	-0.560322	-0.511811
	134	1.15159	1.506	0.193587	-0.236526	0.501858	1.33749	1.28985	1.52068	1.34753	1.12125	1.00409	-0.240407	0.188048	0.495995	1.63479	0.0102582	-0.499161	1.49558	-0.507183	-0.181818	0.306568	1.08942	0.474206	-0.558547	0.657342	-0.15829	-0.200259	-0.18846
	135	-0.217012	-1.219	-0.705658	-1.60806	-0.00706842	-0.997039	-0.371001	0.317506	-0.256141	-0.316079	-0.449066	-0.240407	0.188048	0.495995	-0.66189	0.50265	-0.499161	-0.805313	0.0163607	-0.181818	-0.559035	-0.315443	-0.533701	-0.558547	0.657342	-0.267605	-0.520521	0.00522196
	136	-0.217012	-1.67316	-0.705658	-1.60806	-1.53385	-0.997039	-0.371001	0.317506	-0.256141	-0.795188	-0.449066	-0.240407	-1.10142	1.57408	0.716118	-1.46692	0.492276	0.575224	-0.507183	1.63953	2.03777	-0.783728	-0.533701	-0.558547	-0.694905	0.333678	-0.917127	-1.69119
	137	0.695388	-0.310663	0.64321	0.67783	1.51971	0.170226	0.182617	0.317506	0.278414	-0.795188	-0.933451	0.676643	1.47752	0.495995	0.716118	-0.482134	-0.499161	0.575224	-0.507183	-0.637155	0.306568	-0.783728	-0.533701	-1.05812	-2.04715	-1.06032	-0.530698	-0.510417
	138	0.239188	0.143504	0.64321	0.220652	-0.00706842	-0.413406	-0.371001	0.317506	-0.256141	-0.316079	-0.933451	0.676643	1.0477	-0.0430486	0.716118	0.0102582	-0.499161	0.575224	-0.507183	-0.181818	1.17217	-1.7203	-0.533701	-1.05812	-0.244156	-0.831465	-0.534516	-0.385937
	139	0.239188	0.143504	0.193587	0.220652	-1.02492	-0.413406	-0.371001	0.317506	-0.256141	0.16303	-0.933451	0.676643	1.47752	0.495995	0.256782	-0.974526	-0.994879	0.115045	0.539905	-0.637155	0.739369	-0.315443	0.474206	-1.05812	-0.694905	-0.58925	-0.638168	-0.441519
	140	-1.12941	-1.67316	-1.6049	-1.60806	1.01078	0.170226	-0.371001	-0.284084	-0.256141	-2.23252	-0.933451	-0.240407	-0.241776	-1.66018	-1.58056	0.0102582	-0.00344249	-1.72567	-0.507183	-1.09249	-0.991837	-2.18859	-2.04556	-1.05812	-2.04715	2.91004	0.965681	1.71566
	141	-1.58561	-1.67316	-2.05453	-2.06524	-2.04277	0.170226	-0.924619	-0.284084	-0.790697	-0.316079	-1.41784	-0.698932	-1.10142	-1.12114	-2.0399	-0.974526	-0.994879	-2.18585	0.0163607	-0.637155	0.739369	-1.7203	-1.03765	-1.55769	-2.04715	3.08317	2.46792	0.983536
	142	0.239188	0.143504	0.64321	0.220652	-0.515994	-0.413406	-0.371001	0.317506	-0.256141	1.60036	0.0353198	0.218118	1.0477	0.495995	0.256782	0.50265	0.492276	0.115045	0.0163607	2.09486	2.03777	1.5577	1.48211	-0.558547	0.657342	-0.193075	-0.384127	-0.113208
	143	-0.673211	1.05184	0.193587	0.220652	-0.00706842	0.753859	0.736235	0.317506	0.81297	-0.795188	1.48848	1.59369	0.188048	0.495995	0.716118	0.0102582	-0.00344249	0.575224	0.0163607	-0.637155	-0.991837	-0.783728	-0.533701	1.43973	0.657342	-0.449636	-0.478545	-0.551271
	144	-0.673211	-0.310663	0.193587	-0.236526	-0.00706842	0.753859	0.182617	-0.284084	0.278414	0.16303	-0.449066	1.59369	0.188048	-0.0430486	0.256782	0.0102582	-0.00344249	0.115045	0.0163607	0.728855	1.17217	0.152843	0.97816	-0.558547	-0.244156	-0.529092	-0.575856	-0.660844
	145	-1.12941	-1.219	-1.6049	-1.60806	-0.00706842	0.170226	-0.371001	-0.284084	-0.256141	0.16303	1.48848	-0.240407	-0.241776	0.495995	0.256782	0.50265	-0.994879	0.115045	1.06345	-0.181818	0.306568	0.152843	0.474206	1.43973	0.657342	-1.6624	-0.709054	-1.15252
	146	0.239188	0.143504	0.64321	0.220652	-0.515994	-0.413406	-0.371001	0.317506	-0.256141	0.16303	-0.449066	1.13517	1.0477	0.495995	0.256782	0.50265	-0.994879	0.115045	0.0163607	0.728855	-0.991837	0.152843	1.48211	-0.558547	0.657342	-0.321454	-0.522982	-0.521575
	147	-1.58561	-1.67316	-0.705658	-0.236526	0.501858	-0.413406	-0.371001	-0.284084	-0.256141	-0.316079	-0.933451	-0.698932	-1.10142	0.495995	0.716118	0.0102582	-0.00344249	0.575224	0.0163607	-0.637155	0.739369	-0.315443	-1.03765	-1.05812	-0.694905	0.535246	-0.965939	-0.818764
	148	-1.58561	-1.219	-0.705658	-0.693704	-0.515994	0.170226	-1.47824	-0.284084	-1.32525	-0.795188	-0.933451	-1.15746	-1.10142	1.03504	0.716118	0.0102582	-0.00344249	0.575224	0.0163607	-1.09249	1.17217	-0.783728	-0.0297472	-1.05812	-0.244156	0.17833	-1.13601	-0.83276
	149	0.695388	0.143504	0.193587	0.67783	-1.02492	0.170226	-0.371001	-0.284084	-0.256141	-0.795188	-0.933451	0.218118	0.188048	-1.66018	-1.12123	-0.974526	-0.994879	-1.26549	-2.07781	-0.637155	-0.991837	-0.783728	0.474206	-1.05812	-0.244156	-0.696342	-1.19788	-1.23347
	150	-0.217012	1.05184	-0.256035	1.13501	-0.515994	-0.413406	-0.924619	-0.885674	-0.790697	0.16303	0.0353198	1.13517	1.0477	0.495995	0.716118	0.0102582	-0.00344249	0.575224	1.58699	0.273518	-0.126234	1.5577	0.97816	-0.058977	1.55884	0.035507	-0.391185	-0.146245
	151	0.239188	0.143504	-0.705658	0.67783	1.51971	0.170226	1.28985	2.12227	1.88208	1.60036	1.48848	0.218118	-0.241776	0.495995	-0.66189	0.0102582	-0.00344249	-0.805313	0.0163607	-1.54783	-0.991837	1.5577	1.48211	0.940162	0.206593	-0.380905	-0.562456	-0.593376
	152	1.15159	-0.310663	0.193587	0.220652	1.01078	0.170226	-0.371001	0.317506	0.278414	0.16303	0.0353198	0.218118	0.188048	0.495995	0.716118	0.0102582	-0.00344249	0.115045	2.11054	2.09486	2.03777	0.152843	0.97816	-0.058977	0.657342	-0.325227	-0.437189	0.118757
	153	0.239188	-0.764829	-0.705658	0.220652	-0.00706842	-1.58067	-1.47824	0.317506	0.278414	0.16303	0.0353198	1.13517	-0.6716	-2.19922	-0.202554	0.50265	-0.994879	-0.345134	0.0163607	-0.181818	0.739369	-0.783728	0.97816	-1.05812	0.657342	-0.487939	-0.337005	-0.51448
	154	-0.673211	1.05184	-0.256035	0.220652	-1.02492	-0.413406	-0.924619	-0.885674	-0.790697	-0.795188	-0.933451	0.218118	-0.241776	-1.12114	-1.58056	-0.482134	-0.994879	-1.72567	-1.55427	-0.637155	1.17217	-1.7203	-1.03765	-1.05812	-1.14565	-0.637419	-0.679554	-0.597661
	155	0.239188	-0.310663	0.193587	-0.236526	-0.00706842	-0.997039	-1.47824	0.919095	0.81297	0.16303	-0.933451	1.13517	0.617872	-0.582092	-1.12123	0.0102582	-0.00344249	-1.26549	0.0163607	-1.09249	0.739369	0.152843	0.97816	-0.558547	-0.244156	-0.500073	-0.540843	-0.484325
	156	0.239188	-0.764829	-0.256035	0.67783	-0.00706842	-0.413406	-0.924619	-2.08885	-1.85981	-0.316079	-0.449066	0.676643	0.188048	-1.66018	0.256782	0.0102582	-0.00344249	0.115045	1.06345	-0.181818	0.739369	-0.315443	0.474206	-0.058977	-0.244156	-0.495354	-0.542367	-0.52232
	157	-1.12941	-1.219	-0.256035	-1.60806	-1.53385	-1.58067	-0.371001	-2.08885	-1.85981	-1.2743	-1.41784	-0.698932	-0.241776	-0.0430486	0.256782	0.50265	-0.994879	0.115045	0.0163607	-0.181818	-0.559035	-1.25201	-1.03765	-1.05812	-1.5964	1.1037	-0.500726	-0.318944
	158	2.06399	0.597671	1.99208	1.59219	-0.00706842	-0.413406	-1.47824	-0.885674	-0.790697	0.16303	0.0353198	1.13517	1.47752	-0.0430486	0.256782	0.50265	-0.499161	0.115045	2.11054	2.09486	2.03777	0.152843	-0.0297472	1.9393	1.10809	0.996805	-0.40761	2.59332
	159	1.60779	1.96017	1.99208	1.13501	2.02864	1.92112	1.84347	2.12227	1.88208	2.07947	1.97286	2.05222	1.90734	2.11312	2.09413	1.48743	1.48371	1.95576	2.11054	2.09486	0.739369	2.02599	1.98607	1.43973	2.00959	3.36869	3.2833	3.39347
	160	0.239188	0.597671	1.99208	0.67783	1.51971	0.170226	1.84347	0.919095	0.81297	1.60036	1.48848	2.05222	1.90734	1.57408	2.09413	1.48743	1.48371	1.95576	1.06345	2.09486	1.17217	1.5577	1.98607	1.9393	2.00959	1.52205	1.29375	1.3164
	161	2.06399	1.96017	1.99208	1.13501	2.02864	1.92112	1.28985	2.12227	1.88208	2.07947	1.97286	2.05222	1.90734	2.11312	1.17545	1.97983	1.97943	1.95576	2.11054	2.09486	1.60497	2.02599	1.98607	1.9393	1.10809	3.42213	3.5892	4.1488
	162	2.06399	1.96017	1.99208	1.13501	2.02864	1.92112	1.28985	2.12227	1.88208	1.60036	1.48848	0.676643	1.0477	1.57408	2.09413	0.50265	0.492276	1.0354	1.06345	2.09486	2.03777	0.621129	0.97816	1.9393	2.00959	2.56216	2.0978	3.06933
	163	1.15159	1.05184	1.09283	1.13501	0.501858	0.753859	0.736235	0.919095	0.81297	0.642139	0.519705	0.218118	0.617872	1.03504	-0.66189	1.48743	1.48371	1.49558	1.06345	-0.181818	1.17217	0.621129	-0.0297472	0.440593	0.657342	0.0636078	0.625407	0.933305
	164	-0.217012	0.143504	-0.256035	0.67783	0.501858	-0.413406	0.182617	0.317506	0.278414	-0.316079	-0.449066	0.676643	-0.241776	-0.0430486	0.256782	0.50265	0.492276	0.115045	1.06345	-0.181818	1.17217	-0.315443	0.474206	0.940162	2.00959	-0.415403	-0.5235	-0.438244
	165	2.06399	1.506	1.09283	2.04936	2.02864	1.33749	0.736235	0.919095	0.81297	0.16303	0.0353198	0.218118	1.47752	0.495995	0.256782	0.50265	0.492276	0.115045	1.06345	2.09486	2.03777	0.152843	-0.0297472	1.43973	0.657342	0.632871	0.379247	2.22051
	166	1.15159	0.143504	0.193587	2.04936	-0.515994	0.753859	-0.924619	0.919095	0.81297	0.642139	0.519705	0.218118	-0.241776	0.495995	1.17545	0.0102582	1.48371	1.0354	1.06345	1.63953	1.17217	0.621129	-0.0297472	-0.058977	1.55884	0.0485536	0.302092	0.895163
	167	1.60779	1.506	1.99208	2.04936	1.51971	1.33749	0.736235	0.919095	0.81297	1.12125	1.00409	1.13517	1.90734	1.57408	1.17545	1.48743	1.48371	1.0354	1.06345	1.63953	1.17217	1.08942	1.98607	1.43973	1.55884	2.87778	2.70258	2.34813
	168	0.695388	-0.310663	1.09283	0.67783	-0.00706842	1.92112	1.28985	0.317506	0.278414	0.642139	0.519705	0.218118	-0.241776	1.03504	0.716118	1.48743	1.48371	0.575224	1.06345	1.63953	0.739369	0.152843	-0.0297472	-0.058977	1.55884	-0.239498	0.24519	0.174771
	169	-1.58561	-1.67316	-1.6049	-0.693704	-1.53385	-0.413406	-0.371001	-0.284084	-0.256141	-0.795188	-0.933451	-1.61598	-1.10142	-0.582092	-1.58056	-0.974526	-0.994879	-1.72567	-2.07781	-1.54783	-1.42464	-0.783728	-0.533701	-0.058977	0.657342	-0.175639	1.30059	2.69028
	170	0.239188	0.597671	1.09283	0.220652	-0.00706842	0.170226	1.28985	2.12227	1.88208	0.16303	0.0353198	0.218118	-0.241776	1.03504	0.256782	1.48743	1.48371	1.49558	1.58699	1.63953	-0.126234	0.152843	-0.0297472	0.440593	0.206593	-0.371495	0.177401	0.336117
	171	0.695388	0.143504	-0.256035	-0.236526	-0.515994	0.753859	-0.924619	0.919095	0.81297	0.16303	0.0353198	-0.698932	1.0477	0.495995	1.63479	1.48743	1.48371	0.115045	1.06345	1.63953	0.306568	0.152843	-0.0297472	-0.058977	0.206593	-0.489069	-0.406521	-0.413952
	172	0.695388	0.143504	0.64321	1.13501	0.501858	-0.413406	0.182617	0.317506	0.278414	0.642139	0.519705	0.218118	-0.241776	-1.66018	0.256782	0.0102582	-0.00344249	-0.805313	0.0163607	-1.09249	-0.559035	0.621129	-0.0297472	-0.058977	0.206593	-0.355563	-0.826401	-1.00882
	173	0.695388	0.143504	-0.256035	1.13501	0.501858	-0.413406	-0.924619	-1.48726	-1.32525	0.16303	0.0353198	0.676643	1.0477	0.495995	0.256782	0.0102582	-0.00344249	0.115045	0.539905	-1.09249	1.17217	0.152843	-0.0297472	-0.558547	-0.694905	-0.642855	-0.456524	-0.367179
	174	-0.217012	0.597671	1.09283	1.13501	0.501858	0.170226	0.736235	-0.885674	-0.790697	-0.316079	-0.449066	1.13517	0.617872	1.03504	0.256782	1.48743	-0.00344249	0.115045	-0.507183	1.63953	0.739369	-0.315443	0.97816	0.440593	0.206593	-0.218962	0.0355457	-0.154032
	175	-0.217012	-1.219	-0.256035	-1.60806	0.501858	-0.413406	0.182617	-0.885674	-0.790697	0.16303	0.0353198	-1.15746	0.617872	-2.19922	-0.66189	-0.482134	-0.994879	0.575224	-0.507183	-1.09249	0.739369	0.152843	-0.0297472	0.940162	-0.244156	-0.702227	0.555485	-0.494973
	176	0.695388	0.143504	1.09283	-0.236526	0.501858	-0.413406	0.736235	0.317506	0.278414	0.16303	0.0353198	0.218118	0.617872	1.03504	1.17545	0.50265	0.492276	1.0354	1.58699	-0.181818	1.17217	0.152843	0.474206	1.43973	0.206593	-0.197259	-0.125021	0.0480286
	177	0.695388	0.143504	-0.256035	0.220652	0.501858	-0.413406	0.182617	-0.284084	-0.256141	0.642139	0.519705	1.13517	1.0477	1.03504	0.716118	1.48743	1.48371	0.575224	0.539905	-0.637155	1.17217	0.621129	-0.0297472	0.440593	0.206593	-0.421233	-0.249927	-0.375368
	178	0.239188	0.597671	0.193587	0.67783	-0.00706842	0.170226	-0.371001	-0.885674	-0.790697	0.16303	0.0353198	0.676643	-0.241776	1.03504	1.63479	0.50265	0.492276	0.575224	0.539905	1.63953	0.739369	0.152843	0.474206	0.440593	0.206593	-0.325367	-0.0574733	-0.0345271
	179	0.695388	0.597671	-0.256035	0.220652	0.501858	0.170226	-0.924619	-0.885674	-0.790697	0.642139	0.519705	0.218118	0.617872	-1.12114	0.256782	0.0102582	-0.00344249	-0.805313	-0.507183	-0.637155	0.739369	0.621129	-0.0297472	-0.058977	0.657342	-0.383481	-0.637938	-0.641409
	180	0.695388	0.143504	0.193587	-0.693704	-0.00706842	-0.413406	-0.371001	0.317506	0.278414	0.16303	0.0353198	0.676643	0.188048	-0.582092	0.716118	0.50265	-0.994879	0.115045	1.06345	-0.637155	0.739369	0.152843	0.474206	0.940162	0.206593	-0.44625	-0.563037	-0.45722
	181	-0.217012	1.05184	1.09283	-0.236526	0.501858	0.753859	0.736235	-0.284084	-0.256141	0.16303	0.0353198	0.676643	0.617872	1.03504	-0.202554	0.50265	0.492276	1.0354	0.539905	-0.181818	0.739369	0.152843	0.474206	0.440593	0.206593	-0.324911	-0.31171	-0.162611
	182	0.695388	0.143504	-0.256035	0.67783	0.501858	-0.413406	-0.924619	-0.885674	-0.790697	-0.316079	-0.449066	0.218118	0.617872	1.03504	1.17545	0.50265	0.492276	1.0354	0.539905	0.273518	0.739369	-0.315443	-0.0297472	-0.058977	0.657342	-0.472345	-0.236688	-0.214814
	183	-1.58561	-2.12733	-1.15528	-1.60806	-2.04277	-1.58067	-2.03185	-1.48726	-1.32525	0.16303	0.0353198	-1.61598	-1.53125	-0.582092	-1.12123	-0.482134	-0.499161	-1.26549	0.0163607	-0.181818	-0.559035	-1.7203	-0.533701	-0.058977	-1.14565	1.20547	0.839949	0.677879
	184	-0.217012	-0.310663	-0.705658	1.13501	0.501858	-0.997039	0.182617	0.317506	0.278414	0.16303	0.0353198	0.218118	0.617872	-0.582092	-1.12123	-0.974526	-0.994879	-0.345134	0.0163607	-0.181818	-0.126234	0.152843	-0.0297472	0.940162	0.206593	-0.508577	-0.519212	-0.494044
	185	-1.58561	-1.67316	-1.6049	-1.60806	-1.53385	-1.58067	-1.47824	-1.48726	-1.32525	-1.75341	-1.90222	-1.61598	-1.10142	-1.66018	-2.0399	-1.95931	-1.98632	-2.18585	-1.55427	-2.00317	-1.85744	-1.7203	-2.04556	-2.05726	-2.04715	3.44139	3.40975	3.61648
	186	-1.58561	-1.67316	-1.15528	-0.693704	0.501858	-0.413406	1.28985	-0.284084	-0.256141	-0.316079	-0.449066	-0.698932	-1.10142	-0.582092	-0.202554	-0.482134	-0.499161	-1.26549	-1.55427	-2.00317	-0.991837	-0.315443	-0.0297472	0.440593	0.206593	-0.616892	0.16445	1.94339
	187	-0.217012	0.143504	0.193587	-0.236526	0.501858	-0.413406	-0.371001	0.919095	0.81297	-0.316079	-0.449066	0.218118	0.617872	-0.582092	1.17545	0.50265	0.492276	1.0354	1.06345	0.273518	-0.559035	-0.315443	-0.0297472	0.440593	0.206593	-0.498868	-0.571537	-0.519996
	188	0.695388	0.143504	0.64321	0.67783	0.501858	-0.413406	0.182617	0.317506	0.278414	-0.316079	-0.449066	1.13517	1.47752	0.495995	1.17545	-0.482134	-0.499161	1.0354	0.0163607	-0.181818	0.739369	-0.315443	0.97816	-0.058977	-0.244156	-0.420649	-0.443467	-0.177013
	189	0.239188	0.143504	-0.256035	0.67783	-0.00706842	-0.413406	0.182617	-0.284084	-0.256141	1.12125	1.00409	0.218118	0.188048	-0.582092	0.716118	0.50265	-0.499161	0.575224	1.58699	0.273518	0.739369	1.08942	-0.0297472	0.440593	1.55884	-0.313962	-0.540555	-0.282373
	190	0.239188	0.143504	0.64321	0.220652	0.501858	-0.413406	0.736235	0.919095	0.81297	0.16303	0.0353198	0.218118	0.617872	-0.0430486	1.17545	0.50265	-0.994879	1.0354	-0.507183	-0.637155	-0.559035	0.152843	-0.0297472	-0.058977	0.206593	-0.471779	-0.481154	-0.535379
	191	1.15159	-0.310663	0.193587	0.67783	0.501858	-0.997039	-0.924619	-0.284084	-0.256141	-0.316079	-0.449066	1.13517	0.617872	-0.582092	-0.66189	0.0102582	-0.00344249	-0.805313	0.0163607	-0.637155	-0.126234	-0.315443	0.97816	1.43973	0.657342	-0.12843	-0.72103	-0.723547
	192	2.06399	1.05184	0.64321	1.13501	0.501858	0.753859	1.28985	0.919095	0.81297	1.12125	1.00409	0.676643	0.617872	-0.0430486	1.17545	0.50265	-0.994879	1.0354	1.58699	1.63953	0.739369	1.08942	0.97816	1.43973	1.10809	1.24532	-0.256791	1.51657
	193	-0.217012	0.597671	-0.256035	1.13501	0.501858	0.170226	0.182617	0.317506	0.278414	-0.316079	-0.449066	0.218118	0.617872	-0.582092	-1.12123	0.0102582	-0.00344249	-1.26549	0.539905	-0.637155	0.739369	-0.315443	0.474206	-0.058977	0.657342	-0.419845	-0.725332	-0.580373
	194	-0.217012	-0.764829	-1.15528	-0.693704	-0.515994	-0.413406	-0.924619	0.317506	0.278414	0.16303	0.0353198	0.218118	-0.241776	-1.12114	0.256782	-1.46692	-1.4906	0.115045	0.539905	-0.637155	0.306568	0.152843	-0.533701	-0.058977	1.10809	-0.62474	0.30441	-0.616421
	195	-0.217012	-0.764829	-1.6049	-0.693704	-0.515994	-1.58067	-0.371001	0.317506	0.278414	-2.23252	-2.38661	-0.698932	-0.241776	-0.582092	-1.12123	0.0102582	-0.00344249	-0.345134	-1.03073	-0.637155	-0.991837	-2.18859	-1.03765	-1.05812	-1.5964	0.969448	-0.117997	0.303338
	196	0.695388	-0.310663	0.64321	1.13501	0.501858	-0.413406	1.28985	1.52068	1.34753	0.642139	0.519705	0.218118	0.617872	1.57408	1.17545	1.48743	1.48371	1.49558	0.0163607	-1.09249	0.739369	0.621129	0.97816	-0.558547	0.657342	-0.212556	0.411644	-0.211613
	197	0.695388	-0.310663	1.09283	0.220652	0.501858	-0.413406	0.736235	1.52068	1.34753	1.60036	1.48848	0.218118	0.617872	1.03504	0.256782	1.48743	0.492276	1.0354	1.06345	-0.181818	0.739369	1.5577	1.48211	-0.058977	0.657342	-0.0229796	-0.111016	-0.0936802
	198	-1.58561	-1.67316	-0.705658	-0.693704	-2.04277	-0.997039	-2.03185	-2.08885	-1.85981	-2.23252	-2.38661	-1.61598	-0.6716	-1.12114	-0.202554	-1.46692	-1.4906	-1.72567	0.0163607	-1.09249	0.739369	-0.315443	-0.0297472	-1.55769	-1.5964	0.74681	1.05024	0.371929
	199	1.60779	-0.310663	1.54246	0.220652	-0.00706842	1.92112	1.28985	0.317506	0.278414	2.07947	1.48848	1.13517	1.90734	1.57408	1.17545	0.50265	1.48371	1.0354	1.58699	1.63953	2.03777	2.02599	1.98607	1.43973	1.55884	1.14761	0.566535	1.05715
	200	-1.12941	-1.67316	-1.6049	-2.06524	-0.515994	0.170226	-0.924619	0.317506	0.278414	0.16303	0.0353198	-1.61598	-1.10142	-0.582092	1.17545	0.0102582	-0.00344249	-0.345134	-1.03073	-1.09249	-0.991837	0.152843	-0.533701	-0.058977	-0.694905	0.083808	-0.892899	1.28593
	201	0.695388	0.143504	-0.256035	0.220652	0.501858	-0.413406	-0.924619	0.919095	0.81297	-0.316079	1.00409	0.218118	0.617872	-0.582092	1.17545	0.0102582	-0.00344249	-1.26549	0.539905	0.273518	0.739369	-0.315443	-0.0297472	0.940162	0.206593	-0.446262	-0.514794	-0.50312
	202	1.60779	-0.310663	1.09283	0.67783	1.51971	1.92112	0.736235	0.919095	0.81297	1.12125	0.519705	1.13517	1.47752	1.57408	1.63479	1.48743	1.48371	1.0354	0.539905	-0.181818	0.306568	1.08942	0.97816	0.440593	0.206593	0.144357	0.942957	-0.0051701
	203	1.60779	0.143504	-0.256035	0.67783	0.501858	-0.413406	-0.924619	0.919095	0.81297	-0.316079	0.0353198	1.13517	0.617872	0.495995	0.256782	0.995042	0.987994	0.115045	0.539905	-0.181818	-0.559035	-0.315443	-0.0297472	-0.058977	0.206593	-0.5284	-0.0782211	-0.494489
	204	0.695388	-0.310663	-0.256035	0.220652	-1.53385	-0.997039	-2.03185	-0.885674	-0.790697	-1.2743	0.519705	1.59369	0.617872	-0.582092	0.716118	0.995042	0.987994	0.575224	0.0163607	-0.637155	0.739369	-1.25201	-0.0297472	0.440593	-0.244156	-0.523445	-0.496829	-0.475536
	205	0.695388	0.597671	1.09283	1.13501	-0.515994	-2.1643	-2.03185	-0.885674	-0.790697	-0.316079	0.0353198	0.218118	1.47752	-0.582092	0.256782	0.50265	-0.994879	0.115045	-0.507183	-0.181818	0.739369	-0.315443	-1.03765	-0.058977	0.206593	-0.841685	-0.746365	-0.456152
	206	0.695388	-0.310663	-0.256035	1.13501	-0.515994	-1.58067	-0.924619	-0.284084	-0.256141	0.16303	0.0353198	0.218118	0.188048	-0.582092	-1.12123	-0.482134	-0.499161	-1.26549	0.539905	-0.181818	-0.559035	0.152843	-1.03765	-0.058977	-0.694905	-0.6588	-0.822114	-0.667842
	207	0.695388	0.597671	1.09283	0.67783	0.501858	-0.413406	1.28985	0.919095	0.81297	-0.316079	0.0353198	-0.240407	-0.241776	1.57408	1.17545	1.48743	1.97943	1.0354	0.0163607	-0.181818	-0.126234	-0.315443	0.97816	-0.058977	-0.244156	-0.388458	0.952956	-0.247427
	208	2.06399	1.506	1.54246	1.59219	-0.00706842	0.170226	0.736235	0.317506	0.278414	1.60036	0.0353198	1.59369	1.47752	-0.582092	-1.12123	0.0102582	-0.00344249	-1.26549	1.58699	0.273518	0.306568	1.5577	1.48211	-0.058977	1.55884	1.85559	-1.45786	-0.126378
	209	0.695388	0.143504	0.64321	1.13501	-0.515994	-0.413406	1.28985	0.919095	0.81297	1.60036	0.519705	0.218118	0.617872	-0.582092	0.256782	0.0102582	-0.00344249	0.115045	1.06345	-0.181818	0.306568	1.5577	-0.0297472	0.440593	0.206593	-0.0775926	-0.615312	-0.196952
	210	0.239188	-1.219	-0.256035	-0.693704	-0.00706842	0.170226	-0.924619	1.52068	1.34753	-0.316079	0.519705	-0.240407	0.188048	-0.582092	-1.12123	-0.482134	-0.499161	-1.26549	0.0163607	-0.637155	0.739369	-0.315443	-0.533701	-0.058977	0.206593	-0.385888	-0.138512	-0.287914
	211	0.239188	-1.219	-1.15528	-0.236526	-0.00706842	1.33749	1.28985	-0.284084	-0.256141	-0.316079	0.519705	0.676643	-0.241776	-0.582092	-0.66189	-0.482134	-0.499161	0.115045	-0.507183	-0.181818	-0.126234	-0.783728	0.474206	-0.058977	0.206593	-0.478648	-0.132766	-0.368933
	212	0.695388	-0.764829	-0.256035	-0.236526	0.501858	-0.997039	-0.924619	0.919095	0.81297	-1.2743	-0.449066	-0.240407	-1.10142	-0.582092	-0.202554	-0.482134	-0.499161	-0.345134	0.0163607	-0.637155	-0.559035	-2.18859	0.474206	0.440593	-0.244156	-0.43518	-0.476502	-0.432531
	213	-0.673211	-1.219	-1.6049	-1.60806	-0.515994	-0.997039	0.182617	0.317506	0.278414	-0.795188	0.519705	-0.698932	-1.10142	-1.12114	-1.58056	-0.974526	-0.994879	-1.72567	0.0163607	-0.637155	-0.126234	-0.783728	0.474206	-0.558547	-0.244156	-0.0921521	1.34323	0.637108
	214	-0.673211	-1.219	-1.6049	-2.06524	-0.515994	-0.413406	-0.924619	0.317506	0.278414	-0.795188	-0.449066	-0.698932	-1.10142	-0.582092	-1.12123	0.0102582	-0.00344249	-1.26549	0.0163607	-1.54783	-1.85744	-1.25201	-0.533701	-0.058977	-1.5964	0.948351	0.186417	1.57269
	215	-0.673211	0.143504	-0.256035	1.13501	0.501858	-0.413406	-0.924619	0.919095	0.81297	-0.316079	0.0353198	0.676643	0.617872	-1.12114	-1.58056	-1.46692	-1.4906	-0.805313	0.0163607	-1.09249	0.739369	-0.315443	-0.0297472	-0.058977	0.206593	-0.501091	-0.704744	-0.531621
	216	0.695388	0.597671	1.09283	1.13501	0.501858	0.170226	0.736235	0.919095	0.81297	-0.316079	0.0353198	0.676643	0.617872	-0.0430486	-0.202554	0.50265	-0.994879	-0.345134	0.0163607	-0.637155	-0.991837	-0.315443	-0.0297472	-0.058977	0.657342	-0.429576	-0.734139	-1.0394
	217	0.239188	1.05184	0.193587	-0.236526	1.01078	1.33749	0.736235	-0.284084	0.81297	1.60036	1.48848	1.13517	1.0477	-0.0430486	2.09413	0.995042	0.987994	1.0354	0.539905	0.273518	0.306568	0.621129	1.48211	0.940162	0.657342	-0.122576	-0.134347	-0.251837
	218	-0.217012	-0.310663	0.193587	-0.236526	-2.04277	-0.997039	-0.924619	-0.284084	-1.32525	-0.795188	-0.933451	-0.698932	-0.6716	-0.0430486	-0.202554	-0.482134	-0.00344249	-0.805313	-1.03073	0.273518	-1.85744	-0.315443	-1.03765	-0.558547	-0.244156	-0.397468	-0.52091	-0.327589
	219	-1.12941	-0.764829	-0.705658	-1.15088	-1.02492	-2.1643	-2.03185	-1.48726	-2.39436	-1.75341	-1.41784	-0.698932	-1.96107	-0.582092	-1.12123	-1.95931	-1.98632	-0.345134	-1.03073	-1.54783	-1.85744	-0.783728	-1.54161	-0.558547	-1.14565	0.682605	1.15301	0.903665
	220	1.15159	0.597671	1.09283	0.220652	-1.02492	0.753859	0.182617	0.919095	-1.32525	0.16303	-0.449066	0.218118	-0.241776	-0.582092	-0.66189	-1.46692	-0.499161	-1.26549	-1.55427	-0.637155	-1.85744	0.152843	-0.533701	-1.05812	-0.694905	-1.00648	-1.36723	-1.89045
	221	-0.217012	0.597671	-0.705658	0.220652	-0.00706842	0.753859	-0.371001	-0.284084	-0.256141	0.642139	1.00409	1.13517	1.0477	0.495995	0.716118	0.50265	0.492276	0.575224	0.539905	-0.181818	0.306568	1.08942	0.474206	0.440593	-0.244156	-0.507376	-0.571444	-0.510706
	222	1.15159	1.05184	1.09283	1.13501	2.02864	0.170226	1.84347	1.52068	1.88208	-0.316079	1.00409	0.676643	1.0477	1.03504	0.256782	1.48743	0.987994	1.49558	1.06345	0.273518	-0.126234	-0.783728	0.97816	-0.558547	0.206593	-0.512619	0.790014	0.614831
	223	-1.12941	-0.310663	-0.256035	-0.236526	-0.00706842	-2.1643	-0.924619	-1.48726	-0.256141	0.642139	-0.449066	-0.698932	0.188048	-0.582092	-0.202554	0.995042	0.987994	1.0354	-0.507183	-0.181818	-0.126234	0.621129	0.97816	0.440593	0.206593	-0.838678	-0.753584	-0.572451
	224	0.239188	1.506	0.193587	1.59219	1.01078	0.753859	1.28985	-0.284084	0.81297	-0.795188	0.519705	0.676643	1.0477	-1.12114	-1.12123	0.0102582	-0.994879	0.115045	-0.507183	-0.181818	-0.126234	0.152843	-0.533701	-0.558547	-0.244156	-0.829713	-1.44132	-0.696997
	225	0.695388	0.143504	0.193587	0.220652	1.01078	0.753859	-0.371001	-0.284084	0.81297	0.642139	0.519705	1.59369	-0.241776	-0.0430486	-0.202554	0.50265	-0.00344249	0.575224	1.06345	0.728855	1.60497	0.621129	0.474206	-0.058977	-0.244156	-0.417954	-0.526662	-0.091595
	226	0.239188	1.05184	1.09283	-0.236526	-0.515994	-0.413406	0.736235	0.919095	-0.790697	0.642139	0.519705	0.676643	1.0477	0.495995	-0.202554	0.995042	0.492276	1.0354	0.0163607	0.728855	0.306568	0.621129	0.474206	0.440593	0.657342	-0.130416	-0.240746	-0.11453
	227	-0.217012	0.143504	-0.705658	-0.236526	-1.02492	0.170226	-0.371001	-0.885674	-1.32525	0.16303	0.519705	0.676643	1.0477	-0.0430486	-0.202554	-0.974526	-0.00344249	-0.805313	0.0163607	0.273518	-0.126234	0.621129	0.474206	-0.058977	-0.694905	-0.52484	-0.451834	-0.430451
	228	1.15159	-0.310663	-0.256035	-1.15088	-0.515994	-0.413406	-0.924619	-0.885674	-0.790697	-0.316079	-1.41784	-0.240407	-0.241776	-1.12114	-1.12123	-0.974526	-0.499161	-1.72567	-1.03073	-1.09249	-0.991837	-0.315443	-1.54161	-1.05812	-0.694905	-0.343374	-0.396411	-0.278307
	229	1.15159	0.597671	0.193587	-0.236526	0.501858	0.753859	0.182617	-0.284084	0.278414	1.12125	0.519705	0.676643	0.188048	-0.0430486	0.256782	0.995042	-0.00344249	1.0354	0.539905	0.273518	0.306568	0.621129	0.474206	-0.558547	0.206593	-0.395524	-0.375339	-0.164807
	230	-0.217012	0.597671	-0.705658	0.67783	-0.00706842	0.170226	0.182617	-0.284084	-0.256141	1.12125	1.00409	2.05222	1.47752	1.03504	1.63479	0.50265	0.987994	0.575224	0.539905	0.273518	0.306568	1.08942	0.97816	1.43973	0.657342	-0.379332	-0.43701	-0.447343
	231	1.15159	1.05184	1.54246	1.13501	-0.515994	0.753859	0.736235	1.52068	-0.790697	1.12125	1.00409	0.676643	0.188048	0.495995	1.63479	0.995042	0.492276	1.0354	0.539905	0.273518	-0.126234	1.08942	0.97816	-0.058977	-0.244156	0.180835	0.878411	0.27676
	232	0.239188	0.597671	-0.256035	-0.236526	-0.00706842	-0.413406	0.182617	-0.885674	-0.256141	-0.795188	-0.933451	-0.240407	-0.6716	-0.0430486	-0.66189	-0.974526	-0.00344249	-0.805313	0.0163607	0.728855	-0.126234	0.152843	-1.03765	-0.558547	-0.694905	-0.559924	-0.610384	-0.516249
	233	-0.673211	-0.764829	0.193587	-1.15088	-0.515994	-0.997039	0.182617	-0.885674	-0.790697	-1.75341	-0.933451	-1.15746	-1.10142	-1.12114	-1.12123	-1.95931	-0.994879	-1.72567	-2.07781	-1.54783	-0.991837	-0.315443	-1.03765	-1.55769	-1.5964	0.339988	0.456909	0.788554
	234	-2.04181	-0.764829	-0.705658	-0.693704	-2.04277	-2.1643	-1.47824	-1.48726	-2.39436	-1.2743	-1.41784	-1.61598	-1.53125	-1.66018	-2.0399	-1.95931	-1.4906	-1.72567	-1.55427	-1.09249	-1.85744	-1.25201	-1.54161	-2.05726	-1.14565	1.46066	1.86905	1.73037
	235	0.695388	-0.764829	-0.256035	-1.15088	-0.515994	1.33749	-0.371001	-0.885674	-0.790697	-0.316079	-0.449066	-0.698932	-0.241776	-0.0430486	-0.202554	0.995042	-0.00344249	1.0354	-1.55427	-1.54783	-1.85744	0.152843	-0.533701	-0.058977	0.206593	-0.463839	-0.65561	-0.0862135
	236	1.15159	-0.764829	-0.256035	-1.15088	-0.515994	-2.1643	-2.03185	-0.885674	-0.790697	-1.2743	-1.41784	-0.240407	-0.241776	-0.0430486	-0.66189	0.0102582	-0.00344249	-0.345134	-0.507183	-0.181818	-0.559035	-0.315443	-1.54161	-1.05812	-0.244156	-0.243921	-0.500292	-0.364778
	237	-1.12941	-0.764829	-0.256035	-0.693704	-2.04277	-2.1643	-1.47824	-1.48726	-2.39436	-0.316079	-0.933451	-0.698932	-1.53125	-0.582092	-1.12123	-1.46692	-0.994879	-1.26549	-2.07781	-2.00317	-0.991837	-1.25201	-1.03765	-0.558547	-1.14565	0.381536	0.410105	0.989156
	238	-1.12941	-2.12733	-2.05453	-1.60806	-1.02492	0.170226	0.182617	1.52068	-1.32525	-1.2743	-0.449066	-2.07451	-1.96107	-1.12114	-1.12123	-1.95931	-0.499161	-1.72567	-0.507183	-1.54783	-1.85744	-1.25201	-0.533701	-0.558547	-1.14565	1.34295	2.11197	2.73459
	239	-0.217012	-0.764829	-0.256035	-1.15088	-1.53385	-0.997039	-2.03185	-0.885674	-1.85981	-1.75341	-1.90222	-1.15746	-1.10142	-0.582092	-0.66189	-1.46692	-0.994879	-1.26549	-1.55427	0.273518	-0.126234	-1.25201	-2.04556	-2.05726	-1.14565	0.709638	0.161387	0.108127
	240	-0.673211	-0.310663	-0.256035	0.220652	-0.00706842	-0.413406	-0.924619	-0.885674	-0.256141	-1.75341	-1.90222	-1.15746	-1.10142	-1.66018	-1.58056	-1.95931	-1.98632	-1.72567	-1.03073	0.273518	-0.559035	-1.25201	-2.04556	-1.55769	-1.14565	-0.0119584	0.0388303	-0.201299
	241	1.60779	1.506	1.54246	2.04936	0.501858	1.33749	1.84347	1.52068	0.278414	0.642139	0.519705	1.59369	1.47752	-0.0430486	-0.202554	0.50265	-0.00344249	0.575224	1.06345	0.273518	0.306568	0.152843	0.474206	0.440593	1.55884	0.851752	-0.395321	0.796595
	242	0.239188	0.597671	1.54246	0.220652	-1.02492	0.753859	0.182617	-0.284084	-1.32525	0.642139	0.519705	-0.240407	1.0477	1.03504	1.63479	0.50265	0.987994	0.575224	-0.507183	0.728855	-0.559035	1.5577	0.474206	-0.058977	1.55884	0.19591	0.29776	-0.456023
	243	0.239188	1.506	1.54246	0.67783	1.51971	1.33749	1.28985	1.52068	1.34753	1.60036	1.48848	-0.240407	-0.6716	-0.0430486	-0.66189	1.48743	0.987994	1.49558	-1.55427	0.273518	-0.559035	1.08942	1.48211	0.440593	1.10809	0.778883	0.0318621	-0.554194
	244	-1.58561	-2.12733	-2.05453	-1.60806	1.01078	0.753859	-0.371001	-0.284084	0.81297	1.12125	0.519705	-0.698932	-0.6716	-0.0430486	0.716118	0.50265	-0.00344249	1.0354	1.06345	0.728855	0.306568	0.621129	0.474206	-0.558547	0.206593	-0.925021	-1.28588	-2.49785
	245	1.60779	0.143504	1.09283	1.13501	1.01078	1.33749	-0.371001	0.919095	0.81297	-0.316079	-0.449066	0.676643	1.0477	-1.12114	-0.66189	-0.974526	-0.994879	-0.805313	-1.03073	-1.54783	-0.559035	-1.25201	-0.533701	-1.05812	-1.14565	-1.69634	-1.73821	-1.76115
	246	-0.673211	1.05184	0.64321	1.13501	-0.515994	0.170226	0.736235	-0.284084	-0.790697	1.60036	0.0353198	-0.240407	0.188048	-0.0430486	-0.202554	0.995042	-0.00344249	0.115045	0.539905	0.273518	1.60497	1.08942	-0.0297472	-0.558547	-0.244156	-0.460067	-0.412154	-0.0627924
	247	-1.12941	-0.764829	-0.705658	-1.60806	1.01078	0.753859	0.736235	0.919095	0.81297	-1.2743	-1.41784	-1.15746	-1.96107	-0.0430486	-0.202554	-0.482134	-1.4906	-0.805313	-0.507183	-1.54783	-0.559035	-1.7203	-1.54161	-0.558547	-1.14565	1.11264	0.173795	0.641657
	248	-0.217012	1.506	1.54246	1.59219	-0.515994	0.170226	1.28985	1.52068	-0.790697	1.60036	0.0353198	0.676643	0.188048	-0.0430486	0.716118	0.995042	-0.00344249	1.0354	0.539905	0.728855	0.306568	0.621129	-0.0297472	1.43973	1.55884	0.696823	0.068849	0.487296
	249	-0.217012	0.597671	0.193587	-1.15088	-0.00706842	-0.997039	0.182617	1.52068	-0.256141	0.642139	-0.449066	-0.240407	0.188048	1.03504	1.63479	1.97983	0.987994	0.575224	1.06345	0.728855	0.306568	0.621129	-0.533701	0.940162	0.206593	-0.543678	-0.801738	-0.620672
	250	-0.673211	-0.310663	0.64321	-0.236526	1.01078	0.753859	0.182617	0.317506	0.81297	-1.2743	-1.41784	-0.240407	0.188048	-1.12114	-1.12123	-0.974526	-1.98632	-0.805313	-1.55427	-1.54783	-0.559035	-1.25201	-1.54161	-0.558547	-1.14565	-0.288552	-0.312569	-0.283969
	251	-0.217012	-0.310663	-1.15528	-1.60806	-0.515994	0.170226	0.182617	0.317506	-0.790697	0.642139	0.0353198	-1.15746	-1.53125	1.03504	-0.202554	-0.482134	0.987994	0.575224	-0.507183	-1.54783	-0.559035	1.08942	-0.0297472	-0.058977	-0.244156	-0.675143	-0.862249	-0.0643512
	252	-0.217012	-0.310663	-1.15528	-0.236526	-0.00706842	-0.997039	-0.371001	0.317506	-0.256141	0.642139	0.519705	-2.07451	-1.10142	-0.0430486	0.716118	1.97983	0.987994	1.95576	-1.03073	-1.54783	-1.85744	0.621129	0.474206	-0.558547	0.206593	-0.607095	-1.13545	-0.224609
	253	-0.673211	-0.310663	0.193587	-0.693704	-1.02492	0.753859	0.182617	0.317506	-1.32525	1.12125	1.00409	-0.240407	-0.6716	1.03504	0.716118	0.50265	0.987994	-0.345134	0.0163607	0.728855	-0.559035	1.08942	0.97816	0.440593	-0.244156	-0.759232	-0.935293	-0.458774
	254	-0.217012	1.05184	1.09283	1.13501	-0.515994	0.170226	0.736235	0.919095	-0.790697	0.16303	1.48848	1.13517	0.188048	-0.0430486	-0.202554	0.0102582	0.987994	0.115045	-0.507183	-0.181818	1.17217	1.5577	1.48211	0.940162	-0.244156	0.39477	-0.386919	-0.357859
	255	-2.04181	-0.310663	-0.705658	-0.693704	-1.02492	-2.1643	-0.924619	-1.48726	-1.32525	0.16303	0.0353198	-2.07451	-0.6716	0.495995	-0.66189	-0.974526	0.492276	0.115045	-1.03073	-2.00317	-1.85744	0.621129	-0.0297472	-0.558547	0.657342	-0.683402	-0.314914	0.846097
	256	-0.673211	0.597671	0.64321	-0.693704	1.01078	0.753859	0.182617	0.317506	0.81297	1.12125	1.00409	-0.240407	0.188048	0.495995	1.17545	0.0102582	0.492276	1.95576	1.06345	0.728855	0.306568	0.152843	0.97816	1.43973	1.10809	-0.525712	-0.574528	-0.538382
	257	-0.673211	1.05184	0.64321	0.67783	1.01078	0.753859	0.736235	0.317506	0.81297	-1.2743	0.0353198	-0.240407	0.188048	1.03504	-0.202554	0.0102582	0.987994	0.115045	-1.03073	-2.00317	-1.42464	-0.315443	-0.0297472	-1.55769	-0.694905	-0.832154	-0.323126	-1.05548
	258	1.15159	0.597671	1.54246	1.59219	1.01078	0.753859	0.182617	0.317506	0.81297	1.12125	1.00409	1.13517	0.188048	1.03504	0.716118	1.97983	0.987994	1.95576	-1.03073	0.728855	1.17217	0.152843	0.97816	-0.558547	0.206593	-0.178971	1.30816	0.690521
	259	0.695388	0.597671	0.64321	0.67783	-1.02492	0.170226	0.182617	0.317506	-1.32525	0.642139	0.519705	1.59369	1.0477	0.495995	1.17545	0.995042	0.492276	1.0354	0.539905	0.273518	1.60497	1.08942	0.474206	0.940162	1.10809	0.221948	0.11516	0.272116
	260	1.15159	0.597671	0.64321	1.59219	1.01078	0.753859	0.736235	0.317506	0.81297	1.12125	1.00409	0.218118	0.188048	0.495995	-0.202554	0.995042	0.492276	1.0354	-1.03073	0.273518	1.17217	1.08942	0.97816	1.43973	0.206593	0.643103	0.0196485	-0.0128581
	261	1.15159	0.597671	1.09283	-0.236526	1.01078	0.753859	0.736235	0.919095	0.81297	1.12125	1.00409	1.13517	0.188048	1.03504	0.716118	1.97983	0.987994	-0.805313	-0.507183	-1.09249	-0.991837	0.621129	0.97816	0.940162	0.206593	0.0667882	0.451624	-1.22603
	262	-1.12941	-0.764829	-2.05453	-1.15088	-0.00706842	0.170226	-1.47824	-0.284084	-0.256141	-1.75341	-1.90222	-1.61598	-1.96107	-1.12114	-1.58056	-0.974526	-1.98632	-0.805313	-1.55427	-1.09249	-0.559035	-0.783728	-2.04556	-2.05726	-0.694905	1.7247	1.71795	1.1979
	263	-1.58561	-0.310663	-0.705658	-1.15088	-0.515994	0.170226	-0.371001	-0.284084	-0.790697	0.16303	1.48848	-1.15746	-1.96107	-1.12114	-0.66189	-0.974526	-0.994879	-1.72567	0.0163607	0.728855	1.17217	1.08942	1.48211	0.440593	1.10809	-1.69361	0.559718	-0.387776
	264	1.15159	0.143504	1.54246	1.59219	1.51971	0.753859	-0.371001	0.317506	1.34753	1.12125	1.00409	0.218118	1.0477	1.03504	0.716118	1.97983	0.987994	1.95576	1.58699	0.273518	0.306568	1.5577	0.97816	0.440593	1.55884	1.02409	1.12787	1.15641
	265	0.695388	0.597671	1.09283	1.13501	1.01078	0.753859	0.182617	0.919095	0.81297	1.12125	1.00409	0.676643	0.188048	1.03504	0.716118	1.48743	0.987994	1.49558	1.58699	0.273518	0.306568	1.5577	0.97816	0.940162	1.55884	0.852746	0.638355	0.66235
	266	-2.04181	-1.219	-0.705658	-0.693704	-1.02492	0.170226	0.182617	-1.48726	-1.32525	-1.2743	-1.41784	-0.698932	-1.53125	1.03504	-0.66189	-0.974526	-0.00344249	-0.805313	-1.03073	-0.637155	-0.991837	-2.18859	-1.54161	-2.05726	-2.04715	2.31898	-0.270217	0.868362
	267	-0.217012	0.143504	1.09283	1.13501	-1.02492	0.170226	-0.371001	0.317506	0.278414	0.16303	0.519705	0.218118	0.188048	1.03504	0.256782	0.50265	0.987994	0.575224	-0.507183	1.18419	-0.559035	0.152843	0.474206	0.440593	-0.244156	-0.35641	-0.0965996	-0.400115
	268	-0.217012	0.143504	0.193587	-0.693704	-0.00706842	-0.997039	-1.47824	-1.48726	-0.790697	-0.316079	-1.41784	-1.15746	-0.6716	-0.582092	-1.12123	-0.974526	-0.499161	-0.805313	-1.03073	1.18419	-0.559035	-0.315443	-1.54161	-0.558547	0.206593	-0.396854	-0.413415	-0.425088
	269	-0.217012	-0.310663	-0.256035	-0.236526	-0.00706842	-0.997039	-1.47824	-0.885674	-0.790697	-1.2743	-1.41784	-0.240407	-0.6716	-1.12114	-2.0399	-1.95931	-0.994879	-0.805313	-0.507183	-1.09249	-0.559035	-1.25201	-1.54161	-0.558547	-0.244156	-0.208261	-0.0486724	-0.25337
	270	-1.12941	-0.764829	-1.15528	-1.15088	-1.02492	-0.997039	-1.47824	-2.08885	-0.790697	-0.795188	-1.41784	-1.15746	-1.96107	-1.12114	-1.58056	-0.974526	-1.98632	-0.805313	-1.03073	1.18419	0.306568	-0.783728	-1.54161	-0.058977	-1.14565	0.662055	1.32044	-0.214231
	271	-0.673211	-0.764829	-1.15528	-1.15088	-1.02492	-1.58067	-1.47824	-2.08885	-1.32525	0.16303	1.97286	-1.15746	-1.53125	-0.0430486	-0.202554	-0.974526	0.492276	-0.805313	-0.507183	1.18419	-0.559035	2.02599	1.98607	1.43973	1.10809	-2.39098	-0.303118	-0.163843
	272	1.15159	1.506	0.64321	0.67783	1.01078	0.170226	1.84347	1.52068	0.278414	-1.2743	-0.449066	1.13517	0.188048	1.57408	2.09413	0.0102582	1.48371	0.115045	-0.507183	-0.637155	-0.559035	-1.25201	-0.533701	0.940162	0.206593	-0.694094	1.05348	-0.981429
	273	1.60779	1.96017	0.64321	0.67783	2.02864	1.33749	1.84347	1.52068	1.34753	2.07947	1.97286	2.05222	1.90734	2.11312	2.09413	0.995042	1.97943	1.95576	2.11054	1.18419	1.17217	2.02599	1.98607	1.43973	1.10809	2.01218	2.2385	2.23143
	274	2.06399	1.96017	1.99208	2.04936	1.51971	1.92112	1.84347	2.12227	1.88208	0.16303	0.519705	2.05222	1.47752	1.57408	2.09413	0.995042	1.97943	1.0354	2.11054	1.18419	1.60497	0.152843	0.474206	0.940162	1.10809	1.16359	3.68053	3.49429
	275	1.60779	1.506	0.64321	0.67783	2.02864	1.33749	1.84347	2.12227	1.34753	2.07947	1.97286	1.13517	1.90734	0.495995	1.63479	1.97983	0.492276	1.95576	2.11054	1.18419	1.60497	2.02599	1.98607	1.9393	2.00959	2.247	1.14518	2.12425
	276	1.60779	1.96017	0.64321	0.220652	2.02864	1.33749	1.84347	0.919095	1.34753	0.16303	1.48848	1.59369	1.90734	2.11312	1.63479	0.995042	1.97943	1.0354	1.58699	1.18419	1.60497	0.152843	1.48211	1.9393	1.10809	1.1482	1.81859	1.5163
	277	-2.04181	-2.12733	-2.05453	-2.06524	-1.53385	-0.997039	-0.371001	-1.48726	-0.790697	0.642139	1.00409	-1.15746	-1.96107	-2.19922	-0.66189	-0.974526	-1.4906	-0.805313	0.539905	-0.181818	-0.126234	0.621129	0.97816	1.43973	2.00959	-3.71501	2.90789	-0.0450615
	278	-2.04181	-2.12733	-2.05453	-0.236526	-0.00706842	0.170226	0.182617	-0.885674	0.278414	0.642139	0.0353198	-1.15746	-1.53125	-1.66018	-2.0399	-0.974526	-1.4906	-0.805313	0.539905	0.728855	0.306568	0.621129	-0.0297472	0.940162	0.657342	-1.56765	2.62472	-0.760355
	279	-0.673211	1.05184	0.193587	0.220652	1.01078	1.92112	0.736235	0.317506	1.88208	0.16303	1.00409	-0.240407	-0.241776	-0.0430486	1.17545	0.0102582	0.987994	1.0354	1.06345	0.728855	0.306568	0.152843	0.97816	0.940162	1.55884	-0.266914	-0.420499	-0.280889
	280	-1.12941	-0.764829	-1.15528	-0.236526	1.01078	0.753859	0.736235	-0.284084	0.81297	-0.795188	-0.933451	-0.698932	-1.53125	-0.0430486	0.716118	-0.974526	-0.00344249	-0.805313	0.539905	0.273518	0.306568	-0.783728	-1.03765	-0.558547	-1.5964	0.514615	-0.455072	-0.53229
	281	0.239188	0.597671	0.193587	0.220652	1.51971	1.33749	0.736235	-0.284084	1.34753	0.16303	0.0353198	0.218118	1.0477	-2.19922	-1.58056	-0.974526	-1.98632	-1.26549	-0.507183	-1.09249	-1.42464	0.152843	-0.0297472	0.940162	1.10809	-0.289146	-1.22651	-0.951721
	282	0.695388	1.96017	1.99208	2.04936	-0.515994	0.170226	1.84347	0.317506	0.278414	1.60036	0.519705	0.218118	1.90734	2.11312	0.716118	0.995042	1.97943	1.0354	0.0163607	1.18419	1.60497	1.5577	0.474206	1.9393	1.55884	2.31085	2.48179	1.57523
	283	-0.673211	0.143504	-0.705658	-0.693704	-2.04277	-1.58067	-0.371001	-1.48726	-1.32525	-1.75341	-1.90222	-0.698932	-0.6716	-1.12114	-1.58056	-1.46692	-0.499161	-1.72567	-1.03073	-1.09249	-1.42464	-1.7203	-2.04556	-1.55769	-1.14565	0.459117	0.164527	0.352594
	284	1.15159	1.506	0.64321	0.67783	-0.00706842	1.92112	1.84347	0.317506	1.88208	1.12125	0.0353198	1.59369	1.47752	2.11312	0.256782	0.995042	1.97943	1.0354	0.0163607	0.728855	1.60497	1.08942	-0.0297472	1.43973	2.00959	0.862298	1.11545	0.621948
	285	1.15159	1.05184	0.193587	0.220652	-0.00706842	0.753859	0.736235	-0.284084	0.81297	1.12125	-0.449066	0.218118	1.0477	1.03504	-0.202554	-0.482134	0.987994	0.115045	0.539905	-0.181818	-0.126234	1.08942	-0.533701	-0.058977	-0.244156	-0.461435	-0.307706	-0.402677
	286	0.239188	-0.310663	0.64321	0.67783	-0.00706842	0.170226	0.182617	0.317506	0.278414	0.642139	1.48848	1.59369	0.188048	-0.0430486	-0.66189	-1.95931	-1.4906	-0.805313	0.0163607	1.18419	-0.559035	0.621129	1.48211	0.940162	1.10809	-0.102137	-0.971727	-0.554818
	287	-1.12941	-1.219	-0.705658	-0.693704	-1.02492	0.170226	-0.371001	-0.284084	0.278414	-0.795188	-1.41784	-1.15746	-0.6716	-0.0430486	-0.66189	-0.974526	-1.98632	-0.805313	-2.07781	-0.637155	-1.42464	-1.25201	-1.54161	-0.558547	-1.14565	0.819986	0.543977	1.07686

## Sheet: Sheet1
		Original sample (O)	Sample mean (M)	Standard deviation (STDEV)	T statistics (|O/STDEV|)	P values	Result
	Pandawa's Customer Experience -> Brand Awareness	0.562136	0.563341	0.0410996	13.6774	5.68434e-14	H1 Accepted
	Brand Awareness -> Retention	0.0659727	0.0661229	0.034444	1.91536	0.0555031	H2 Rejected
	Pandawa's Customer Experience -> Retention	0.34445	0.346079	0.040786	8.44528	5.68434e-14	H3 Accepted
	Pandawa's Customer Experience -> Brand Image	0.513773	0.51635	0.0479249	10.7204	5.68434e-14	H4 Accepted
	Brand image-> Retention	0.0780353	0.0788504	0.0370274	2.1075	0.0351238	H5 Accepted
	Pandawa's Customer Experience -> Brand Resonance	0.463309	0.464607	0.0564791	8.20319	5.68434e-14	H6 Accepted
	Brand Resonance -> Retention	0.576875	0.575953	0.0322683	17.8775	5.68434e-14	H7 Accepted
	Trust x Brand Awareness -> Retention	-0.0322286	-0.0334658	0.03218	1.00151	0.316628	H8a Rejected
	Trust x Brand Resonance -> Retention	0.0726572	0.0715104	0.0336156	2.16142	0.0307104	H8b Accepted
	Trust x Brand Image -> Retention	-0.0823994	-0.0816253	0.0388593	2.12045	0.0340168	H8c Accepted
	Trust -> Retention	0.369755	0.370761	0.0332951	11.1054	5.68434e-14

## Sheet: Sheet2
		Original sample (O)	Sample mean (M)	Standard deviation (STDEV)	T statistics (|O/STDEV|)	P values	Result
	Pandawa's Customer Experience -> Brand Image -> Retention	0.0400925	0.0408879	0.0199046	2.01423	0.0440389	Brand image acts as a mediating variable
	Pandawa's Customer Experience -> Brand Awareness -> Retention	0.0370857	0.0375053	0.0201076	1.84436	0.0651893	Brand awareness does not act as a mediating variable
	Pandawa's Customer Experience -> Brand Resonance -> Retention	0.267272	0.267686	0.0365423	7.31402	2.84217e-13	Brand resonance acts as a mediating variable
